## Inflammation promotes tumor aggression by stimulating stromal cell-dependent collagen crosslinking and stromal stiffening

Ori Maller<sup>1\*</sup>, Allison P. Drain<sup>1\*</sup>, Alexander S. Barrett<sup>2\*</sup>, Signe Borgquist<sup>3,4</sup>, Brian Ruffell<sup>5</sup>, Pham T Thanh<sup>2</sup>, Tina Gruosso<sup>6</sup>, Hellen Kuasne<sup>6</sup>, Johnathon N. Lakins<sup>1</sup>, Irene Acerbi<sup>1</sup>, J. Matthew Barnes<sup>1</sup>, Travis Nemkov<sup>2</sup>, Aastha Chauhan<sup>7</sup>, Jessica Gruenberg<sup>7</sup>, Aqsa Nasir<sup>7</sup>, Olof Bjarnadottir<sup>3</sup>, Zena Werb<sup>8,9</sup>, Peter Kabos<sup>10</sup>, E. Shelley Hwang<sup>12</sup>, Morag Park<sup>6</sup>, Lisa M. Coussens<sup>5</sup>, Andrew C. Nelson<sup>7</sup>, Kirk C. Hansen<sup>2,14</sup> and Valerie M. Weaver<sup>9,13,14,15</sup>

<sup>1</sup>Department of Surgery, Center for Bioengineering and Tissue Regeneration, University of California, San Francisco, California, USA

<sup>2</sup>Department of Biochemistry and Molecular Genetics, University of Colorado Denver - Anschutz Medical Campus, Aurora, CO, USA

<sup>3</sup>Division of Oncology and Pathology, Department of Clinical Sciences, Lund, Lund University

<sup>4</sup>Clinical Trial Unit, Clinical Studies Sweden, Forum South, Skåne University Hospital, Lund, Sweden

<sup>5</sup>Cell, Developmental & Cancer Biology, Oregon Health & Science University; Knight Cancer Institute, Oregon Health & Science University, Portland, Oregon, USA

<sup>6</sup>Goodman Cancer Research Centre, McGill University, Montreal, QC, Canada; Department of Biochemistry, McGill University, Montreal, QC, Canada; Department of Oncology, McGill University, Montreal, QC, Canada

<sup>7</sup>Department of Laboratory Medicine and Pathology, University of Minnesota, Minneapolis, MN, USA

<sup>8</sup>Department of Anatomy and Biomedical Sciences Program, University of California, San Francisco CA, USA

<sup>9</sup>UCSF Helen Diller Comprehensive Cancer Center, University of California, San Francisco, San Francisco, CA, USA

<sup>10</sup>Department of Medicine, Division of Medical Oncology, University of Colorado Anschutz Medical Campus, Aurora, Colorado, USA

<sup>11</sup>Department of Pathology, University of California, San Francisco, CA, USA

<sup>12</sup>Department of Surgery, Duke University Medical Center, Durham, NC, USA

<sup>13</sup>Departments of Bioengineering and Therapeutic Sciences, and Radiation Oncology, Eli and Edythe Broad Center of Regeneration Medicine and Stem Cell Research

\*These authors contributed equally to this work

<sup>14</sup>These authors jointly supervised this work

The authors have no conflicts of interest to declare.

### <sup>15</sup>Corresponding Author:

Valerie M. Weaver  
Center for Bioengineering and Tissue Regeneration  
Department of Surgery  
University of California, San Francisco  
Telephone: (415) 476-3826  
Email: [valerie.weaver@ucsf.edu](mailto:valerie.weaver@ucsf.edu)

1 **Abstract**

2 Collagen deposition and stromal stiffening accompany malignancy, compromise treatment, and  
3 promote tumor aggression. Clarifying the molecular nature of and the factors that regulate  
4 extracellular matrix stiffening in tumors should identify biomarkers to stratify patients for therapy  
5 and therapeutic interventions to improve outcome. We profiled lysyl hydroxylase- and lysyl  
6 oxidase-mediated collagen crosslinks and quantified the greatest abundance of total and complex  
7 collagen crosslinks in more aggressive human breast cancer subtypes with the stiffest stroma.  
8 These tissues also harbored the highest number of tumor-associated macrophages (TAM), whose  
9 therapeutic ablation not only reduced metastasis, but also concomitantly decreased accumulation  
10 of collagen crosslinks and stromal stiffening. Epithelial-targeted expression of the crosslinking  
11 enzyme lysyl oxidase had no impact on collagen crosslinking in PyMT mammary tumors, whereas  
12 stromal cell targeting did. Consistently, stromal cells in microdissected human tumors expressed  
13 the highest level of collagen crosslinking enzymes. Immunohistochemical analysis of a cohort of  
14 breast cancer patient biopsies revealed that stromal expression of lysyl hydroxylase two, an  
15 enzyme that induces hydroxylysine aldehyde-derived collagen crosslinks and stromal stiffening  
16 correlated significantly disease specific mortality. The findings link tissue inflammation, stromal  
17 cell-mediated collagen crosslinking and stiffening to tumor aggression and identify lysyl  
18 hydroxylase two as a novel stromal biomarker.

19

20 **Significance**

21 We show infiltrating macrophages induce stromal fibroblast, and not epithelial, expression of  
22 collagen crosslinking enzymes that drive tumor stiffening. Stromal enzyme LH2 is significantly  
23 upregulated in breast cancer patients with the stiffest stroma, the most trivalent HLCCs and the  
24 worst prognosis, underscoring its potential as a biomarker and therapeutic target.

25

## 26 **Introduction**

27 Pathological accumulation of extracellular matrix (ECM) accompanies the formation of all  
28 solid tumors(1-3). The tumor ECM is composed primarily of interstitial collagen that is  
29 progressively reorganized and stiffened(2,4). The collagenous fibrotic tumor ECM compromises  
30 treatment and is linked to poor patient prognosis(5-8). Tumor biopsy analysis showed that a  
31 thick fibrous collagenous ECM associates with less differentiated tumors and that this  
32 phenotype predicts poor patient survival, emphasizing the relevance of collagen  
33 architecture(1,4,9). Patients with pancreatic ductal adenocarcinomas (PDACs) that are  
34 surrounded by stiff, thick fibrous collagens have a shorter survival, and invasive breast  
35 carcinomas with the stiffest ECM stroma at their invasive front are the most aggressive(1,2).  
36 These observations suggest that stromal stiffness reflects collagen organization may be an  
37 important prognostic variable. Consistently, preclinical studies using organotypic cultures and  
38 rodent models provide plausible evidence for a causal relationship between collagen  
39 organization, stromal stiffness, tumor cell invasion in culture, and metastasis *in vivo*(10-14).  
40 These findings underscore the clinical relevance of collagen architecture and stiffness to  
41 malignancy, and emphasize the need to clarify the molecular nature of the collagenous ECM so  
42 that new biomarkers can be identified and anti-cancer therapeutics may be  
43 developed(1,2,15,16).

44 Interstitial type I fibrillar collagen is the ECM component that contributes most  
45 significantly to the tensile strength of tissue(17). The tensile strength of interstitial collagen  
46 depends upon the activities of two major families of enzymes: the lysyl hydroxylases (LH; gene  
47 name procollagen-lysine, 2-oxoglutarate 5-dioxygenase or PLOD) and the lysyl oxidases (LOX),  
48 which regulate fibrillogenesis of newly synthesized collagen molecules through intermolecular  
49 covalent crosslinking(18-21). Fibrotic human tumors express high levels of LOX and LH  
50 enzymes(22). Tumor grade and overall patient survival associate with total tissue LOX and  
51 PLOD2 mRNA(21,23-25). Pharmacological or antibody-mediated inhibition of LOX in MMTV-

52 Her2/Neu mice or genetic reduction of PLOD2 in subcutaneously-injected lung tumor epithelial  
53 cells reduce tissue fibrosis, stromal stiffening and collagen crosslinking and concomitantly  
54 decrease tumor incidence and aggression(12,23). Moreover, elevating LOX or LH2-mediated  
55 collagen crosslinking enhances fibrosis and stromal stiffness and promotes malignant  
56 transformation and tumor aggression in lung and mammary xenografted tumors(12,23). These  
57 observations suggest that the direct targeting of specific collagen crosslinking enzymes has  
58 clinical merit for the treatment of cancer. However, given caveats with recent clinical trials  
59 targeting ECM modifiers including suboptimal activity of inhibitory treatments and the risk of off-  
60 target effects, strategies designed to interfere with the induction and activation of these  
61 crosslinking enzymes offer an attractive alternative(26). Towards this goal, the identification and  
62 causal implication of additional factors that regulate the levels and/or activity of collagen  
63 crosslinking enzymes has the potential to identify new predictive biomarkers and alternative  
64 anti-tumor treatment targets.

65 Pre-neoplastic lesions are inflamed, and pathological fibrosis correlates with  
66 inflammation(27,28). Chronic inflammation and experimental manipulations that promote  
67 inflammation in rodent models induce fibrosis by secreting factors such as metalloproteinases  
68 and TGF $\beta$ (14,28-31). Furthermore, fibrotic tumors are frequently inflamed, and this inflammation  
69 promotes tumor aggression, whereas either inhibiting inflammation or decreasing macrophage  
70 infiltration reduce tumor metastasis and enhance anti-tumor treatment(2,27,32-35).  
71 Nevertheless, it remains unclear if inflammation promotes tumor progression and aggression by  
72 inducing stromal stiffening, and if so, whether this is regulated via epithelial and/or stromal  
73 fibroblast-mediated collagen remodeling and crosslinking.

## 74 **Results**

75 **xAAA profiling identifies increased levels of collagen crosslinks and stromal stiffness as**  
76 **indicators of breast tumor aggression**

77 To clarify the role of collagen crosslinking in tumor fibrosis we developed a crosslinked  
78 amino acid analysis (xAAA) method that enabled the characterization and quantification of  
79 specific collagen crosslinks in tissues across a wide range of collagen levels. We utilized solid  
80 phase extraction (SPE) enrichment followed by high pH amide hydrophilic chromatography  
81 (HILIC) coupled to a benchtop orbitrap (QExactive) mass spectrometer for these  
82 measurements. The validated method detected all known LOX-generated crosslinks including  
83 divalent (lysinonorleucine, dihydroxy lysinonorleucine), trivalent (pyridinoline and deoxy-  
84 pyridinoline) and tetravalent (desmosine and isodesmosine) crosslinked amino acids linearly  
85 over four orders of magnitude, with calculated limits of quantification (LLOQ) in the femtomolar  
86 range (**Suppl. Fig. 1; Suppl. Table 1**)(36). The technique revealed a positive correlation  
87 between collagen crosslinking and abundance in excised human clinical specimens with very  
88 low to very high collagen concentrations and varying mechanical properties (**Suppl. Fig 2**). The  
89 method also identified a subset of hydroxylysine aldehyde (Hyl<sup>ald</sup>)-derived collagen crosslinks  
90 (HLCCs) crucial for the mechanical strength of tissue(17,37).

91 We next obtained snap-frozen biospecimens of normal human breast tissue (N=10; age  
92 between 22 and 58) and human tumor biopsies representing early stage (stage 1-2) invasive  
93 breast cancers (IBC) excised from mastectomy specimens. Molecular subtyping that subdivides  
94 human breast tumors stratified by estrogen receptor (ER+) and human epidermal growth factor  
95 receptor two (HER2+) status and ER/PR/HER2-negative (triple negative; TN) is a key  
96 determinant used to direct the treatment of breast cancer patients. Accordingly, we chose  
97 human breast tumor biopsies that represented ER+ (N=8; age between 42 and 71); HER2+  
98 (N=6; age between 40 and 76) and TN (N=6; age between 50 and 71). H&E stained tissue  
99 sections confirmed the presence of normal glandular structures in the normal controls and  
100 invasive breast cancer in the tumor specimens (**Fig. 1a; top panels**). Polarized light imaging of  
101 Picrosirius-stained (PS) tissue revealed that the normal breast tissue stroma had very little  
102 fibrillar collagen, whereas stromal tissue in all patients with IBCs contained abundant fibrillar

103 collagen (**Fig. 1a; middle panels**) that second harmonic generation (SHG) imaging indicated  
104 was thicker and more linearized (**Fig. 1a; bottom panels**). Polarized light microscopy and two-  
105 photon imaging further revealed that the level of fibrosis in the tissue was higher in HER2+ as  
106 compared to the ER+ breast tumors, and was further increased in the TN tumors, consistent  
107 with our previous report that TN tumors contain a high density of aligned collagen fibers (**Fig.**  
108 **1a; middle and bottom panels**)(2). AFM microindentation revealed a significant increase in the  
109 elastic modulus of the stroma associated with the invasive front of all the IBC tissues (**Fig.**  
110 **1b**)(2,4,12). xAAA analysis revealed a significant increase in total collagen crosslinking in all the  
111 IBCs (**Fig. 1c, Suppl. Fig. 5**). These findings are consistent with an association between  
112 collagen crosslinks, tissue fibrosis and stromal stiffness, as has been previously documented in  
113 experimental murine models of mammary cancer(12). Interestingly, when we subdivided the  
114 IBC collagen crosslinking analysis into breast tumor subtype the most significant increase in  
115 total collagen crosslinks was calculated to be in the TN breast tumors (**Fig. 1i**). Furthermore,  
116 biochemical quantification of total tissue collagen 1A1 or 1A2 did not account for the higher total  
117 number of collagen crosslinks in the TN breast tumor tissue (**Fig. 1k**). Instead, molecular  
118 characterization of the isolated tissue collagen revealed that the TN tumors had a distinctive  
119 crosslink profile due to a strong preference for a combination of DHLNL, Pyr, and d-Pyr  
120 crosslinks (**Fig. 1d-j**). Subtype analysis further revealed that the level of hydroxylysine  
121 aldehyde-derived collagen crosslinks (HLCCs) in the TN subtype correlated significantly and  
122 positively with the stiffness of the stroma at the invasive front of the tumor tissue (**Fig. 1l**). These  
123 findings highlight the importance of HLCC collagen crosslinking in breast cancer aggression.

#### 124 **Increased collagen crosslinking correlates with high expression of stromal LOX and** 125 **PLOD2 in aggressive tumor subtypes**

126 To determine if the observed increase in collagen crosslinking and stromal stiffness in  
127 TN tumors was related to the expression levels of enzymes implicated in regulating collagen  
128 crosslinking, we analyzed publicly available human breast cancer gene expression array data (n

129 = 1904) for the genes coding these enzymes and examined their correlation to breast cancer  
130 subtype. Bioinformatics analyses revealed a significant increase in the major collagen  
131 crosslinking enzyme LOX, but not lysyl oxidase like two (LOXL2), in the more aggressive HER2  
132 and TN tumor subtypes and indicated that LOX levels were particularly high in TN tumors (**Fig.**  
133 **2a-b**). The arrays also showed bulk gene expression of PLOD2, the major regulator of HLCC  
134 accumulation, to be highly upregulated in aggressive human TN breast cancers (**Fig. 2c**).  
135 To gain insight into the cellular sources of LOX and LH2 in human tumors, we used laser  
136 capture microdissection to isolate regions of tumor epithelium and stroma to identify the origins  
137 of LOX and LH2 in invasive human breast cancers (38,39). Gene expression analysis of stromal  
138 and epithelial compartments revealed that the stromal cells in the tumor tissue expressed  
139 significantly more LOX and PLOD2 than the associated tumor epithelium. The data further  
140 indicated that this relationship was more evident in the breast tissue from women with ER-/PR-  
141 breast cancer that is frequently the more aggressive tumor subclass (**Fig. 2d-g**).

142 The findings implicate, but do not definitively demonstrate a role for LOX and PLOD2 in  
143 generating the increased level and greater complexity of collagen crosslinking we quantified in  
144 the more aggressive human breast tumors. Nevertheless, the combination of these gene  
145 expression data with our findings showing increased collagen crosslink abundance provide  
146 compelling evidence to suggest that increased expression of LOX and PLOD2, particularly from  
147 stromal cells, likely contribute to elevated levels of collagen crosslinks and HLCCs in TN tumors.  
148 Moreover, given that TN tumors are the most aggressive and lethal breast cancer, these data  
149 link human breast tumor aggression to increased levels of total and complex collagen crosslinks  
150 and higher stromal stiffness. Accordingly, the findings implicate the collagen crosslinking  
151 enzymes LOX and LH2, and by extension factors that regulate their expression, in breast  
152 cancer aggression.

153 **Stromal — and not epithelial — crosslinking enzymes regulate tissue fibrosis and**  
154 **collagen crosslinking *in vivo***

155 Prior studies demonstrated that both cancer cell lines and stromal fibroblasts express  
156 LOX and LH2 to induce tissue stiffening and fibrosis implying they also drove collagen cross-  
157 linking. Seminal articles identified hypoxia-induced HIF1a as a key regulator of tumor epithelial  
158 LOX and LH2 expression and suggested epithelial secretion of these enzymes drives collagen  
159 remodeling, crosslinking and stiffening that foster tumor cell dissemination and primes the pre-  
160 metastatic niche to facilitate metastatic colonization (22,24,25). Our analysis of breast cancer  
161 clinical specimens showed that the stromal cells in the breast tissue express higher levels of  
162 LOX and PLOD2 as compared to the breast tumor epithelium. Moreover, our prior studies  
163 showed LOX is expressed in stromal fibroblasts in a transgenic mouse model of ErbB2-induced  
164 mammary tumor malignancy. Furthermore, we demonstrated that fibroblasts expressing LOX  
165 injected into a cleared mammary fat pad not only induced ECM remodeling and stiffening but  
166 also potentiated the growth and malignant progression of pre-malignant tumor cells injected into  
167 the modified glands (12). Thus, the relative contribution of tumor- and stromal- derived collagen  
168 crosslinking enzymes to tumor fibrosis, ECM remodeling and collagen crosslinking remains  
169 unclear; particularly in the context of spontaneous tumors and patient tumors in which the ECM  
170 evolves concurrently with tumor progression.

171 To directly test the extent to which epithelial-derived LOX can crosslink collagen and  
172 induce tissue fibrosis and stromal stiffening in mammary tissue, we created a genetically  
173 engineered mouse model (GEMM) in which we targeted and controlled luminal epithelial-  
174 specific expression of mouse LOX using the MMTV-rtTA promoter (Epithelial LOX  
175 overexpression [OX]). (**Fig. 3a, Suppl. Fig. 6a-b**). We crossed these mice into the PyMT  
176 spontaneous mammary tumor model to enhanced LOX expression in the mammary tumor  
177 epithelium (PyMT epithelial LOX OX) and assayed their stromal phenotype as compared to the  
178 mammary glands from age-matched PyMT control mice (PyMT). Again, despite confirming  
179 ectopic LOX expression and elevated levels of cleaved LOX protein in the mammary tumor  
180 epithelial compartment (**Suppl. Fig 6c**), we were not able to detect any increase in the levels,



181 nor any altered organization of the mammary gland interstitial collagen (**Fig 3b-c**). Moreover,  
182 xAAA crosslinking analysis revealed that the level of collagen crosslinks between the PyMT  
183 control and PyMT epithelial LOX OX mammary gland stroma were indistinguishable (**Fig. 3d-i**).  
184 Nevertheless and importantly, we could easily and consistently detect a significant increase in  
185 fibrillar collagens, collagen crosslinks and stromal stiffness in the PyMT mammary tumors as  
186 compared to age-matched FVB mammary glands lacking tumors (**Fig. 4c,f-k**). These studies  
187 both validate the sensitivity of our crosslinking assay and imply that tumor epithelial LOX is not  
188 the primary driver of collagen crosslinking and stiffening in endogenous mammary tumors.

189 We and others have implicated stromal fibroblast LOX as a key promoter of epithelial  
190 tumor progression and aggression(12,14,40). To directly test the functionality of the ectopically-  
191 expressed LOX and the relevance of fibroblast-specific expression of LOX, we next created  
192 mouse cohorts of PyMT GEMMs in which we restricted ectopic LOX expression to the stromal  
193 population using the Col1a1-tTA promoter (MMTV-PyMT+/-; Col1a1-tTA+/-;TetO\_mLox+/-;  
194 herein denoted PyMT LOX OX) (**Fig. 4a, Suppl. Fig. 7b**). To begin with, induction of LOX in the  
195 stromal cells markedly enhanced the amount of fibrillar collagen in the MMTV-PyMT LOX OX  
196 mammary glands, as revealed by quantification of polarized images of Picrosirius Red stained  
197 tissue (**Fig. 4b, second row images; quantified in c**). We also detected more and thicker  
198 linearized interstitial collagen when LOX was increased in the stromal cells by two-photon  
199 second harmonic generation imaging (**Fig. 4b, third row panels**). In addition, immunostaining  
200 revealed more phosphorylated tyrosine 397 focal adhesion kinase protein (p<sup>Y397</sup>FAK) in the  
201 mammary epithelium of the glands in which stromal LOX was elevated (**Fig. 4b, bottom**  
202 **panels**), likely reflecting the increase in elasticity that we measured in the tissue stroma using  
203 atomic force microscopy (AFM) indentation(12) (**Fig. 4d-e & Suppl. Fig. 9b**). Consistently, we  
204 measured higher levels of total collagen crosslinks in the PyMT LOX OX mice as compared to  
205 the levels quantified in the MMTV-PyMT control glands (**Fig. 4f**). Furthermore, the most  
206 significant increases that we quantified in the PyMT LOX OX glands were dihydroxy

207 lysinonorleucine (DHLNL) and pyridinoline (Pyr) crosslinks (**Fig. 4g-k**), which are the crosslinks  
208 generated through the HLCC pathway that promote mechanical stability and strength in skeletal  
209 tissue(37,41). Of note, we did not detect any increase in DHLNL or Pyr in the mammary glands  
210 in which ectopic LOX expression was elevated in the mammary epithelium using the MMTV  
211 promoter (**Fig. 3g-h**). These findings imply that stromal cells are the primary regulators of  
212 interstitial collagen crosslinking and stromal stiffening in mammary tumors.

### 213 **Tissue inflammation regulates tissue fibrosis, collagen crosslinking and stromal** 214 **stiffening**

215 Cancer progression is accompanied by tissue inflammation and the most aggressive  
216 human breast tumors with the stiffest invasive stroma harbor the highest number of  
217 macrophages(2,35). Consistently, decreasing the number of tumor macrophages, either through  
218 genetic ablation of macrophage colony stimulating factor (CSF-1) or via pharmacological and  
219 inhibitory antibody treatment with anti-CSF1 antibody, reduces lung metastasis in the PyMT  
220 mouse model of mammary cancer(33,34,42,43). Interestingly, macrophage ablation was more  
221 effective at preventing lung metastasis in the PyMT mammary tumor model when the treatment  
222 was initiated early, prior to malignant transformation and coincident with the onset of tissue  
223 fibrosis(33). These findings raise the intriguing possibility that macrophage ablation may  
224 regulate tumor aggression, at least in part, by promoting collagen remodeling and inducing ECM  
225 crosslinking and stromal stiffening (**Fig. 3 & 4**).

226 To assess the possibility that there is a causal association between macrophage-  
227 mediated tissue inflammation, tumor fibrosis and ECM stiffening and mammary tumor  
228 aggression, PyMT mice were treated with anti-CSF-1 antibody or a non-specific IgG control  
229 antibody commencing at four weeks of age, prior to the onset of ductal hyperplasia(44). Mouse  
230 cohorts (6/treatment group/time point) were sacrificed at eight and eleven weeks of age.  
231 Immunostaining confirmed efficient reduction of mammary tumor tissue macrophages at eight  
232 weeks of age, as evidenced by significantly reduced F4-80 immunostaining that was also

233 evident in the eleven week old treated tissue (**Fig. 5a top panel, Suppl. Fig. 8a**). The excised  
234 lungs from the eleven week mice confirmed reduced frequency of lung metastasis in the anti-  
235 CSF-1 antibody-treated group (**Fig. 5b**), consistent with our prior work documenting a significant  
236 inhibition of lung metastasis in fourteen week old mice when anti-CSF-1 treatment was initiated  
237 at four weeks(33). The mammary glands from the eight and eleven week old mice were excised  
238 and analyzed for fibrosis and biomechanical properties (**Fig. 5a,c-i**). Despite confirming an  
239 equivalent number of fibroblasts in the treated and nontreated groups, polarized images of PS  
240 stained tissue revealed lower levels of total fibrillar collagen in the stroma of the eight week anti-  
241 CSF1 antibody treated group (**Fig. 5a, third row panel, Suppl. Fig. 10b-c**). AFM  
242 microindentation additionally demonstrated that the tissue stroma from both the eight week old  
243 (**Fig. 5d**), and the eleven week old (not shown) mammary glands was softer, likely accounting  
244 for the reduced integrin mechanosignaling detected in the CSF1-antibody treated tissue, as  
245 revealed by less intense staining for <sup>pY397</sup>FAK (**Fig. 5a, second row panel**). Consistently, we  
246 also observed reduced levels of Lox mRNA in eight week, anti-CSF1 treated mice by in situ  
247 hybridization (**Fig. 5a, bottom panel, Fig. 5e**). In agreement with prior studies, nearly all the  
248 detected Lox mRNA was restricted to stromal cells (**Fig 5a, bottom panel**)(14). These findings  
249 suggest that reducing the level of tumor-associated macrophages (TAMs) not only prevents  
250 lung metastasis but also concomitantly reduces tissue fibrosis and stiffening, likely by  
251 preventing stromal cell activation.

252 TAMs secrete abundant TGF $\beta$  that stimulates fibroblast differentiation to a myofibroblast  
253 phenotype and induces expression of collagen crosslinking enzymes including LOX(14). PCR  
254 analysis of flow activated cell sorted (FACS) cells from the transformed mammary glands of  
255 PyMT mice (11 weeks) confirmed that the TAMs expressed by far the highest levels of TGF $\beta$ ,  
256 as compared to neoplastic epithelium and the cancer-associated fibroblasts (**Fig. 5j**). These  
257 findings suggest that the tumor infiltrating macrophages could promote fibrosis and stromal

258 stiffening through secreted TGF $\beta$ ; a finding supported by a strong stromal pSMAD2 (SMAD2  
259 pS465/467) in the IgG control antibody-treated PyMT mammary glands (**Fig. 5k-l**). To examine  
260 whether TAM recruitment could regulate collagen crosslinking in human tumors we queried a  
261 publicly available human breast tumor gene expression data set for TAM markers and collagen  
262 modifying enzymes. Consistent with a role for TAMs in stimulating expression of collagen  
263 modifying enzymes, gene expression of the TAM marker CD163 positively correlated with both  
264 LOX and PLOD2 but not LOXL2 in human breast tumors (n = 1904) (**Fig. 5m-o**). Moreover, co-  
265 staining of resected human breast tumors with the macrophage/monocyte marker CD68 and the  
266 downstream TGF $\beta$  signaling molecule pSMAD2 Ser465/467 revealed a significant positive  
267 correlation between pSMAD2 Ser465/467 and infiltrating tumor macrophages at the invasive  
268 front of human breast tumors (**Fig. 5p-q**). Furthermore, FACS analysis established a significant  
269 correlation between the infiltrating tumor associated macrophages, as demonstrated by  
270 CD14<sup>hi</sup>CD11b<sup>+</sup> HLA-DR<sup>+</sup> cell surface markers normalized to total CD45 infiltrating cells, and the  
271 elastic modulus of the invasive front of human invasive breast cancers (**Fig. 5r**). These findings  
272 suggest that tumor inflammation and macrophage secreted factors such as TGF $\beta$  could  
273 promote tissue fibrosis by enhancing fibroblast expression of the collagen crosslinking enzymes  
274 LOX and PLOD2, but not LOXL2, to induce collagen crosslinking and stromal stiffening.

## 275 **LH2 inhibition reduces lung metastasis and stromal LH2 predicts poor prognosis in** 276 **breast cancer patients**

277 Using the data set generated from the micro-dissected tumors, we next explored the clinical  
278 relevance of epithelial vs. stromal LOX and PLOD2 expression by assessing their relative  
279 contribution to overall survival in breast cancer patients. Surprisingly, neither stromal cell nor  
280 epithelial LOX predicted overall patient survival in this cohort (**Fig. 6a-b**). However, the findings  
281 clearly showed that overexpression of stromal PLOD2, but not epithelial PLOD2, significantly  
282 correlated with poor breast cancer patient prognosis (**Fig. 6c-d**). The data provide further

283 evidence that HLCCs, formed primarily through the activities of collagen crosslinking enzymes  
284 expressed by stromal cells, promote breast tumor aggression that contributes to poorer overall  
285 survival. The findings also highlight the importance of the collagen crosslinking profile and its  
286 potential impact on stromal stiffness in tumor aggression.

287         LH2 (the protein encoded by PLOD2) is a key enzyme that regulates the level of HLCC  
288 crosslinking of fibrillar collagen and consequently contributes substantially to the tensile  
289 properties of the tissue stroma(19,23,45). We quantified the highest level of HLCC crosslinking  
290 and the stiffest invasive front in the breast tissue from women with the most aggressive breast  
291 cancers (**Fig. 1j**). Consistently, when we analyzed the gene expression data from a published  
292 cohort of breast cancer patients we observed that ER-/HER2- (TN; n=133) breast cancers  
293 express the highest level of the PLOD2 gene transcript as compared to the levels expressed in  
294 HER2+ (n=73) and ER+/HER2- (luminal, n=314) breast tumors (**Suppl. Fig. 11a**)(46). Further  
295 analysis showed that high PLOD2 expression in breast cancer patients with HER2+ and TN  
296 tumors significantly predicts reduced distant metastasis-free survival (DMFS), as well as  
297 increased risk of relapse in TN tumors (**Suppl. Fig. 11b-d**)(46,47). These findings implicate  
298 PLOD2/LH2 as a key regulator of breast tumor aggression through its ability to induce the  
299 HLCC crosslinking of fibrillar collagens that enhance the stiffness of the tumor stroma.

300         To evaluate whether LH2 does enhance stromal stiffness to promote breast tumor  
301 aggression, we systemically treated a cohort of PyMT mice with the LH2 inhibitor minoxidil or  
302 vehicle (PBS) from five weeks of age until sacrifice at either 11-12 weeks or 13-14 weeks of age  
303 (**Fig. 6e**). Consistent with its predicted role in enhancing stromal stiffness through modifying the  
304 nature of collagen crosslinks, AFM microindentation revealed that the phenotypically-similar  
305 collagen-rich ECM adjacent to tumors from the minoxidil treated mice (see polarized imaging of  
306 picrosirius red stained tissue) was significantly softer when compared to the vehicle-treated  
307 age/stage-matched PyMT mice (**Fig. 6f-h**). Furthermore, inhibiting LH2 also significantly  
308 decreased lung metastasis, causally linking HLCC collagen crosslinking to stiffness-mediated

309 breast tumor aggression (**Fig. 6i**). Our gene expression data from the epithelial and stromal  
310 microdissection cohort indicated that stromal PLOD2, but not epithelial PLOD2, strongly  
311 predicted poor survival in breast cancer patients. Therefore, we next sought to definitively  
312 assess the relative contribution of stromal versus neoplastic epithelial LH2 protein expression to  
313 human breast tumor aggression using a large tissue array of annotated human breast tumor  
314 biopsies. To accomplish this, we first developed an LH2 immunostaining protocol (IHC) and  
315 then we analyzed neoplastic epithelial and stromal expression of the LH2 enzyme in tissue  
316 biopsies from a large cohort of histopathologically classified breast cancer patients (N=505) with  
317 accompanying clinical information and follow up data (**Suppl. Table 2** and **Suppl. Table 3**). LH2  
318 IHC staining in the epithelium and stromal cells was scored as low, intermediate and high and  
319 the relationship between epithelial versus stromal expression and breast cancer patient  
320 outcome was calculated (**Fig. 6j; Suppl Fig. 12a**). IHC scoring analysis revealed that only a  
321 modest number of patients with poorly differentiated breast tumors expressed moderate to high  
322 levels of epithelial LH2 (**Suppl. Fig. 12b**); a finding that accords with prior links between tumor  
323 size, hypoxia and LH2-dependent tumor aggression(23,24). More strikingly however, we  
324 observed that a disproportionately high number of breast cancer patients with moderately and  
325 poorly differentiated breast tumors had high stromal cell LH2 (indicated by an H score of above  
326 230; **Fig. 6k**). These data and our observation that even well differentiated breast tumors  
327 express intermediate levels of stromal cell LH2 (H score above 120 and equal or less than 230)  
328 imply that stromal cell LH2, rather than epithelial LH2, may be a more robust indicator of breast  
329 tumor aggression. Consistently, stratification of breast tumor patient analysis into ER+/HER2-  
330 (N=296); HER2+ (N=36) and TN (N=32) showed an enrichment for intermediate and high  
331 stromal LH2 H-score in the more aggressive cancer subtypes (**Suppl. Table 2** and **Suppl.**  
332 **Table 3**). Furthermore, we uncovered a significant correlation between high stromal cell LH2 H-  
333 score and shorter breast cancer patient-specific survival when adjusted for age at diagnosis  
334 (**Fig. 6l**). We also established a significant association between stromal cell but not epithelial

335 LH2 levels and survival in lymph node positive breast cancer patients but not lymph node  
336 negative breast cancers (**Fig. 6m-n; Suppl Fig. 12d-e**). These clinical data identify stromal cell  
337 LH2 as a novel biomarker with potential to predict metastatic disease and poor patient survival  
338 among breast cancers overall, as well as within the highest risk TN breast cancer subtype.

339

#### 340 **Discussion:**

341 We identified infiltrating macrophages as key regulators of stromal cell-mediated  
342 collagen crosslinking, stromal stiffening and tumor metastasis. Our clinical findings corroborated  
343 our experimental results, revealing significant associations between macrophages and collagen  
344 crosslinking enzymes providing evidence for a critical impact of inflammatory stromal cell-  
345 mediated collagen crosslinking and stromal stiffening in tumor aggression and patient outcome.  
346 Diverse subsets of myeloid cells account for adverse patient outcomes because they  
347 differentially promote angiogenesis, tumor cell intravasation, and suppress the anti-tumor  
348 immune response(48). Our results expand this perspective to include a key role for early  
349 infiltrating macrophages in initiating a collagen crosslinking and stiffening program that  
350 ultimately fosters tumor aggression and progression. We also determined that TN breast  
351 cancers contain much higher amounts of LH2- and LOX-derived collagen crosslinks.  
352 Specifically, we demonstrated that significantly higher levels of HLCC crosslinks could explain  
353 their higher stromal stiffness and aggressiveness(2). Intriguingly, in depth collagen analysis  
354 suggested that each breast tumor subtype exhibits a distinct collagen organization, stiffness and  
355 crosslinking profile, raising the possibility that distinct collagen architectures and crosslinking  
356 signatures may reflect differences in tissue pathobiology. Indeed, TN breast cancers often  
357 present with high macrophage infiltration; an observation that is consistent with our AFM, two  
358 photon and collagen crosslinking analysis data(2). Given that the immune cell infiltrate  
359 significantly influences treatment response it is tempting to speculate that distinct collagen  
360 architectures, crosslinking signatures and stiffnesses similarly regulate therapeutic efficacy.

361           We determined that stromal LH2 is a robust predictor of survival in breast cancer  
362 patients, especially in those that are lymph node positive, supporting a potentially important  
363 clinical link to stromal collagen crosslinking. Our data also revealed that both the upregulation of  
364 crosslinking enzymes and in turn, collagen crosslinking, occur at an early stage of malignancy  
365 that is concurrent with tumor cell invasion and coincident with the accumulation of infiltrating  
366 macrophages(49). In part, this may explain why therapeutics targeting LOX and LOXL2 have  
367 thus far failed to significantly prolong cancer patient survival. Substantial levels of collagen  
368 crosslinking are likely to have occurred prior to therapy administration, and while these agents  
369 may prevent further crosslinking activity, they are not capable of reversing crosslinks or collagen  
370 modifications already present in the tissue. The early initiation of collagen crosslinking also  
371 suggests that a detectable increase in stromal LH2 may provide an early prognostic marker of  
372 disease progression and aggression that could inform treatment strategies. To that end, our  
373 results show for the first time that LH2-derived collagen crosslinks are not only a distinct feature  
374 of enhanced stromal stiffening in TN breast cancer but are able to predict distant metastasis-  
375 free survival. These results also suggest that the profile of collagen crosslinks, and not simply  
376 crosslink abundance alone, may play a role in promoting tumor aggression, thus warranting  
377 further investigations into the contributions of HLCCs to ECM mechanical properties and tumor  
378 aggression.

379           Our findings identify fibroblasts as the dominant cell population that promotes  
380 reorganization and crosslinking of interstitial collagen to stiffen the tissue stroma. Only stromal-  
381 targeted, and not epithelial-targeted, tissue-specific inducible LOX produced any measurable  
382 change in collagen architecture, stiffness or crosslink abundance in a spontaneous tumor  
383 (25,50,51). Our conclusion is consistent with earlier work in which we failed to detect any  
384 alterations in fibrosis, collagen organization or stiffness when LOXL2 was either genetically-  
385 ablated, or ectopically-increased in the mammary epithelium of PyMT mouse tumors, despite  
386 documenting a significant impact on metastasis(40). Nevertheless, it is possible that our bulk



387 assay would not detect any small increase in collagen crosslinking induced by invading tumor  
388 cells expressing high levels of LOX. To this end, immortalized tumor cells engineered to  
389 overexpress LOXL2 injected orthotopically as a bolus of cells were able to induce fibrosis and  
390 quantifiable changes in collagen remodeling and tissue stiffening; a finding we too confirmed  
391 using isolated PyMT tumor cells overexpressing the LOXL2 enzyme(40). Nevertheless, our data  
392 support the notion that in spontaneous tumors, the proximity of stromal cells to collagen and  
393 their significantly higher expression of crosslinking enzymes dictate the profile and extent of  
394 collagen crosslinking. Given that LH2 modifies collagen intracellularly and stromal cells secrete  
395 the vast majority of the interstitial fibrillar collagen, it is not surprising that this is the case(52,53).  
396 Moreover, our results stress the necessity of choosing an appropriate model to study tumor  
397 associated ECM remodeling and suggest that orthotopic models may fail to accurately  
398 recapitulate the natural evolution of ECM in tumor progression.

399 Our findings not only underscore the importance of stromal stiffness and collagen  
400 crosslinking in cancer-associated fibrosis and disease aggression, but also define in more detail  
401 the molecular nature of collagen modifications that accompany pathological fibrosis. Clarifying  
402 the nature of collagen modifications and specific mechanisms regulating those alterations in  
403 fibrosis will assist in the strategic design of novel, efficacious strategies to combat progressive  
404 fibrosis and should prove instrumental in enabling further experimentation to understand  
405 pathological fibrosis. Indeed, defining the molecular regulators that stimulate collagen cross-  
406 linking, and mechanisms that distinguish resolvable from non-resolvable fibrosis would identify  
407 attractive therapeutic targets for several pathological fibrotic diseases with limited treatment  
408 options.

#### 409 **Methods:**

##### 410 **Human breast specimen acquisition and processing**

411 Fresh human breast specimens from breast reduction, prophylaxis, or breast tumor mastectomy  
412 were either embedded in an optimum cutting temperature (OCT) aqueous embedding

413 compound (Tissue-Plus, Scigen, Cat# 4583) within a disposable plastic base mold (Fisher, Cat#  
414 22-363-554) and were snap frozen by direct immersion into liquid nitrogen and kept at -80°C  
415 freezer until cryo-sectioning for analysis, or specimens were formalin fixed and paraffin  
416 embedded (FFPE). All human breast specimens were collected from prospective patients  
417 undergoing surgical resection at UCSF or Duke University Medical Center between 2010 and  
418 2014. The selected specimens were de-identified, stored, and analyzed according to the  
419 procedures described in Institutional Review Board (IRB) Protocol #10-03832 and #10-05046,  
420 approved by the UCSF Committee of Human Resources and the Duke's IRB (Pro00034242)(2).

#### 421 **Mouse studies**

422 Macrophages were depleted in MMTV-PyMT mice by i.p. injections of 1mg of anti-CSF1  
423 antibody clone 5A1 or an IgG1 control every 7 days starting at 4 weeks of age. Mice were  
424 sacrificed at 8 and 11 weeks of age for tissue analysis.

425 Minoxidil and PBS vehicle was administered by i.p. injections of 3 mg/kg minoxidil in PBS three  
426 times per week starting at 6 weeks of age. Mice were sacrificed at 11-12 and 13-14 weeks of  
427 age for tissue analysis.

#### 428 **Generation of mice**

429 All mouse studies were maintained under pathogen-free conditions and performed in  
430 accordance with the Institutional Animal Care and Use Committee and the Laboratory Animal  
431 Research Center at the University of California, San Francisco.

#### 432 **TetO-mLOX-eGFP construct and transgenic mouse generation**

433 Full length mouse Lox (mLox) cDNA was purchased from OriGene. The full length ORF was  
434 amplified by PCR using forward and reverse primers respectively:

435 GCAGGGATCCGCCACCATGCGTTTCGCCTGGGCTG and

436 GGCGTCTAGAGCACCATGCGTTTCGCCTGGGCTGTGC. Following digestion with BamHI

437 and XbaI, the PCR product was inserted into pSK TetO IRES 3xnlEGFP(54) downstream of

438 the Tet regulated minimal CMV promoter and a 5' UTR containing a chimeric intron of human  $\beta$ -

439 globin and immunoglobulin heavy chain genes, which was expressed as a bicistronic mRNA via  
440 an internal ribosome entry site (IRES2) with eGFP targeted to the nucleus by a N terminal in  
441 frame fusion of 3 tandem repeats of the SV40 nuclear localization sequence (nls). The fragment  
442 containing the expression cassette from Tet regulated promoter to SV40 polyadenylation signal  
443 (SV40pA) was agarose gel purified from XhoI–EagI digested donor plasmid and was used to  
444 generate TetO-mLox-eGFP transgenic mice by pronuclear injection into FVB/n oocyte (Mouse  
445 Biology Program at UC Davis; project number MBP-834; colony number PN663).

#### 446 **Generation of MMTV-PyMT/Col1a1(2.3)-tTA/TetO-mLox-eGFP mice**

447 The MMTV-PyMT/Col1a1(2.3)-tTA/TetO-Rs1 triple transgenic mice were generated by  
448 heterozygote or homozygote crosses of mice carrying the TetO-mLox-eGFP transgene with  
449 mice carrying heterozygote of the Col1a1(2.3)-tTA transgene (line 139)(55) or MMTV-rtTA and  
450 MMTV-PyMT transgene(56) to generate the experimental triple-transgenic genotype. In all  
451 breeding thereafter, MMTV-PyMT/Col1a1-tTA or MMTV-rtTA/TetO-mLox-eGFP male mice  
452 were crossed with TetO-mLox-eGFP female mice. Two mg/mL doxycycline hyclate (Alfa Aesar;  
453 Cat# J60579) was added to 5% sucrose water to modulate TetO-mLox-eGFP transgene  
454 expression.

#### 455 **Preparation of human breast specimens for hydrolysis**

456 OCT was removed from tissue blocks by first transferring biospecimens to a conical tube and  
457 then performing 5X washes with 70% ethanol followed by 5X washes with 18 MΩ H<sub>2</sub>O<sup>48</sup>. Each  
458 wash consisted of vortexing the sample for 15 minutes at 4°C and then centrifuging at 18,000 x  
459 g for 15 minutes at 4°C. Between 1 and 3 milligrams of tissue was washed with 1X PBS buffer  
460 by vortexing for 15 minutes at 4°C and then sonicated on ice for 20 seconds using a Sonic  
461 Dismembrator M100 (ThermoFisher, San Jose, CA, USA). The homogenate was then  
462 centrifuged at 18,000 x g for 20 minutes at 4°C. The supernatant was removed and the pellet  
463 was re-suspended in 1mg/mL NaBH<sub>4</sub> (prepared in 0.1N NaOH) in 1X PBS for 1 hour at 4°C with  
464 vortexing. The reaction was neutralized by adding glacial acetic acid to a final concentration of

465 0.1% (pH ~ 3 -4)(57). The sample was then centrifuged at 18,000 x g for 20 minutes at 4°C. The  
466 supernatant was removed and the pellet was washed three times with 18 MΩ H<sub>2</sub>O to remove  
467 residual salt that could interfere with downstream LC-MS/MS analysis. The remaining pellet was  
468 dried under vacuum for further analysis.

#### 469 **Protein hydrolysis**

470 The dried sample was placed in a glass hydrolysis vessel and hydrolyzed in 6N HCl, 0.1%  
471 phenol. The hydrolysis vessel is flushed with N<sub>2</sub> gas, sealed and placed in a 110°C oven for 24  
472 hours. After hydrolysis, the sample was cooled to room temperature and then placed at -80°C  
473 for 30 minutes prior to lyophilization. The dried sample was re-hydrated in 100μL of 18 MΩ H<sub>2</sub>O  
474 for 5 minutes, then 100 μL of glacial acetic acid for 5 minutes and finally 400 μL of butan-1-ol for  
475 5 minutes. Importantly, 10 μL of sample is removed after re-hydration in water and saved for  
476 determination of hydroxyproline content.

#### 477 **Preparation of crosslink enrichment column**

478 CF-11 cellulose powder is loaded in a slurry of butan-1-ol: glacial acetic acid, water (4:1:1)  
479 solution onto a Nanosep MF GHP 0.45μm spin columns until a settled resin bed volume of  
480 approximately 5mm is achieved. The resin is washed with 1.5 mL 4:1:1 organic mixture using an  
481 in-house vacuum manifold set up. Re-hydrated samples are then loaded onto individual  
482 columns, the vacuum is turned on and the sample is pulled through the resin into glass  
483 collection vials. The flow through is again passed over the resin to ensure maximal binding of  
484 crosslinked amino acids and set aside. The column is then washed with 1.5 mL of fresh 4:1:1  
485 organic mixture. A fresh collection vessel is placed under the column and 750 μL of 18 MΩ H<sub>2</sub>O  
486 is used to elute crosslinked amino acids off of the CF-11 resin. The eluent is then placed in a  
487 speed vac and run until complete dryness. Dried eluent is then reconstituted in a buffer  
488 appropriate for downstream MS analysis on amide HILIC UHPLC columns.

#### 489 **UHPLC analysis**

490 Up to 20  $\mu$ L of tissue hydrolysates were analyzed on a Vanquish UPHLC system  
491 (ThermoFisher, San Jose, CA, USA) using an Acquity UHPLC BEH Amide column (2.1 x  
492 100mm, 1.7  $\mu$ m particle size – Waters, Milford, MA, USA). Samples were separated using a 5  
493 minute gradient elution (55% - 40% Mobile phase B) at 250  $\mu$ L/min (mobile phase: (A) 10mM  
494 ammonium acetate adjusted to pH 10.2 with  $\text{NH}_4\text{OH}$  (B) 95% acetonitrile, 5% Mobile Phase A,  
495 pH 10.2, column temperature: 35°C.

#### 496 **MS data acquisition**

497 The Vanquish UPHLC system (ThermoFisher, San Jose, CA, USA) was coupled online with a  
498 QExactive mass spectrometer (Thermo, San Jose, CA, USA), and operated in two different  
499 modes – 1. Full MS mode (2  $\mu$ scans) at 70,000 resolution from 75 to 600 m/z operated in  
500 positive ion mode and 2. PRM mode at 17,500 resolution with an inclusion list of in-tact  
501 crosslinked amino acid masses (Supplementary Table 2), and an isolation window of 4 m/z.  
502 Both modes were operated with 4 kV spray voltage, 15 sheath gas and 5 auxiliary gas.  
503 Calibration was performed before each analysis using a positive calibration mix (Piercenet –  
504 Thermo Fisher, Rockford, IL, USA). Limits of detection (LOD) were characterized by  
505 determining the smallest injected crosslinked amino acids (LNL, DHLNL, d-Pyr,) amount  
506 required to provide a signal to noise (S/N) ratio greater than three using < 5 ppm error on the  
507 accurate intact mass. Based on a conservative definition for Limit of Quantification (LOQ), these  
508 values were calculated to be threefold higher than determined LODs.

#### 509 **MS data analysis**

510 MS Data acquired from the QExactive were converted from a raw file format to .mzXML format  
511 using MassMatrix (Cleveland, OH, USA). Assignment of crosslinked amino acids was performed  
512 using MAVEN (Princeton, NJ, USA)(58). The MAVEN software platform provides the means to  
513 evaluate data acquired in Full MS and PRM modes and the import of in-house curated peak lists  
514 for rapid validation of features. Normalization of crosslinked amino acid peak areas was  
515 performed using two parameters, 1. Hydroxy proline content and 2. Tissue dry weight pre-

516 hydrolysis (in milligrams)(57). Hydroxy proline content is determined by running a 1:10 dilution  
517 of the pre-enrichment sample through the Full MS mode (only) described above and exporting  
518 peak areas for each run.

#### 519 **Quantification of crosslinked amino acids**

520 Relative quantification of crosslinked amino acids was performed by exporting peak areas from  
521 MAVEN into GraphPad (La Jolla, CA, USA) and normalizing based on the two parameters  
522 described above. Statistical analysis, including T test and ANOVA (significance threshold for P  
523 values <0.05) were performed on normalized peak areas. Total crosslink plots were generated  
524 by summing normalized peak areas for all crosslinks in a given sample. Total HLCC plots were  
525 generated by summing normalized peak areas for all HLCC (DHLNL, Pyr, dPyr) crosslinks in a  
526 given sample.

#### 527 **Picrosirius red staining and quantification**

528 FFPE tissue sections were stained using 0.1% Picrosirius red (Direct Red 80, Sigma-Aldrich,  
529 Cat# 365548 and picric acid solution, Sigma-Aldrich, Cat# P6744) and counterstained with  
530 Weigert's hematoxylin (Cancer Diagnostics, Cat# CM3951), as previously described(2).  
531 Polarized light images were acquired using an Olympus IX81 microscope fitted with an analyzer  
532 (U-ANT) and a polarizer (U-POT, Olympus) oriented parallel and orthogonal to each other.  
533 Images were quantified using an ImageJ macro to determine percentage area coverage per  
534 field of view. The ImageJ macro is available at <https://github.com/northcotti/picrosirius-red>.

#### 535 **Second harmonic generation image acquisition**

536 Second harmonic generation (SHG) imaging was performed using a custom-built two-photon  
537 microscope setup equipped resonant-scanning instruments based on published designs  
538 containing a five-PMT array (Hamamatsu, C7950), as previously published(2). The setup was  
539 used with two channel simultaneous video rate acquisition via two PMT detectors and an  
540 excitation laser (2W MaiTai Ti-Sapphire laser, 710–920 nm excitation range). SHG imaging was  
541 performed on a Prairie Technology Ultima System attached to an Olympus BX-51 fixed stage

542 microscope equipped with a 25X (NA 1.05) water immersion objective. Paraformaldehyde-fixed  
543 or FFPE tissue sections were exposed to polarized laser light at a wavelength of 830 nm and  
544 emitted light was separated using a filter set (short pass filter, 720 nm; dichroic mirror, 495 nm;  
545 band pass filter, 475/40 nm). Images of x-y planes at a resolution of 0.656 mm per pixel were  
546 captured using an open-source Micro-Magellan software suite.

#### 547 **Immunofluorescence/Immunohistochemistry**

548 Immunofluorescence staining was performed as previously described(2). Briefly, mouse tissues  
549 were harvested and fixed with 10% buffered formalin phosphate (Fisher, Cat# 100-20) for 16-24  
550 hours at room temperature and then further processed and paraffin-embedded. Five- $\mu$ m  
551 sections dried for 30 minutes in 60°C, followed by deparaffinization and rehydration. Antigen  
552 retrieval was performed using DAKO Target Retrieval Solution (DAKO, Cat# S1699) for five  
553 minutes in a pressure cooker set to high pressure. Tissue sections were incubated with anti-  
554 FAK pY397 antibody (Abcam, Cat# Ab39967, dilution 1:25) overnight at 4°C and with anti-rabbit  
555 IgG Alex Fluor 633 (ThermoFisher, Cat# A-21070, dilution 1:2000) for one hour at room  
556 temperature. Antigen retrieval for immunofluorescent staining of SMAD2 pS465/467,  
557 cytokeratin 8+18, cytokeratin 5, F4/80, vimentin, and PDGFR $\alpha$  was performed using Diva  
558 Decloaker (BioCare, Cat# DV2004MX) for five minutes in a pressure cooker set to high  
559 pressure. Tissue sections were incubated with anti-SMAD2 pS465/467 antibody (Millipore, Cat#  
560 AB3849-I, dilution 1:100), anti-F4/80 antibody (AbD Serotec, clone Cl:A3-1, Cat# MCA497GA,  
561 dilution 1:400), anti-cytokeratin 8+18 antibody (Fitzgerald, Cat# 20R-CP004, dilution 1:400),  
562 anti-cytokeratin 5 antibody (Fitzgerald, Cat# 20R-CP003, dilution 1:400), anti-vimentin antibody  
563 (Cell Signaling, Cat# 5741, dilution 1:100), and anti-PDGFR $\alpha$  (CD140a) antibody (Biolegend,  
564 Cat# 135901, dilution 1:100) overnight at 4°C and with anti-rat IgG Alex Fluor 488  
565 (ThermoFisher, Cat# A-11006, dilution 1:1000), anti-guinea pig IgG Alex Fluor 568  
566 (ThermoFisher, Cat# A-11075, dilution 1:1000), anti-rabbit IgG Alex Fluor 633 (ThermoFisher,

567 Cat# A-21070, dilution 1:2000), anti-rabbit IgG Alex Fluor 633 (ThermoFisher, Cat# A-21070,  
568 dilution 1:1000) for one hour at room temperature.

569 Quantification of stromal nuclear SMAD2 pS465/467 was performed using Imaris 9. Surfaces  
570 were created around each nucleus and epithelial nuclei were manually excluded based on  
571 cytokeratin signal and cell morphology. The means of the mean nuclear signal intensity for all  
572 stromal nuclei were calculated for each field of view and averaged for every animal.

573 Lungs from 11 week old IgG1 control and anti-CSF1 treated PyMT mice were cut into 5 micron  
574 sections from 5 layers with 100 microns between the first three layers and 50 microns between  
575 the last two layers. Sections were analyzed for metastases by PyMT staining. Antigen retrieval  
576 was performed in Tris-EDTA buffer at pH 9 for four minutes in a pressure cooker set to low  
577 pressure. Tissue sections were incubated with anti-PyMT antibody (Novus Biologicals, Cat# NB-  
578 100-2749, dilution 1:250) overnight at 4°C and with a biotinylated anti-rat antibody for 1 hour at  
579 room temperature. Vectastain Elite ABC (Vector, Cat# PK6100) and ImmPACT DAB Peroxidase  
580 (Vector, Cat# SK-4105) were used for signal detection and nuclei were counterstained with  
581 methyl green.

### 582 **mRNA In Situ Hybridization**

583 Fresh, RNase-free FFPE sections were stained with RNAscope multiplex fluorescent reagent kit  
584 V2 according to standard manufacturer protocol. Target retrieval was performed using 8 minute  
585 incubation in a pressure cooker set to low pressure. Opal 520 and Opal 570 (PerkinElmer) were  
586 used at 1:1500 for target visualization.

### 587 **Gene expression by RT-qPCR**

Total RNA was reverse-transcribed using random primers (Amersham Biosciences) and results were normalized to 18S RNA to control for varying cDNA concentration between samples. The primer sequences used are 18s forward 5'-GGATGCGTGCAATTTATCAGA-3' and reverse 5'-GGCGACTACCATCGAAAGTT-3', Lox forward 5'-CGGGAGACCGTACTGGAAGT-3' and



reverse 5'-CCCAGCCACATAGATCGCAT-3', Loxl2 forward 5'-CACAGGCACTACACAGCAT-3' and reverse 5'-CCAAAGTTGGCACACTCGTA-3', and Tgfb1 forward 5'-TCATGTCATGGATGGTGCCC-3' and reverse 5'-GTCACTGGAGTTGTACGGCA-3'.

## 588 **Atomic force microscopy data acquisition**

589 Atomic force microscopy (AFM) measurements were performed as previously described(2).  
590 Briefly, 20 $\mu$ m OCT-embedded frozen human breast tissue or 30 $\mu$ m mouse mammary gland  
591 sections were fast thawed by immersion in PBS at room temperature. Next, these sections were  
592 immersed in PBS containing phosphatase inhibitors (Roche, Cat# 04906845001), protease  
593 inhibitor (Roche, Cat# 04693124001), and propidium iodide (ACROS, Cat# 440300250) and  
594 placed on the stage for AFM measurements. AFM indentations were performed using an  
595 MFP3D-BIO inverted optical AFM (Asylum Research) mounted on a Nikon TE2000-U inverted  
596 fluorescent microscope. Silicon nitride cantilevers were used with a spring constant of 0.06 N m<sup>-1</sup>  
597 and a borosilicate glass spherical tip with 5  $\mu$ m diameter (Novascan Tech). The cantilever was  
598 calibrated using the thermal oscillation method prior to each experiment. The indentation rate  
599 was held constant within each study but varied between 2-20  $\mu$ m s<sup>-1</sup> with a maximum force of 2  
600 nN between studies. Force maps were obtained as a raster series of indentations utilizing the  
601 FMAP function of the IGOR PRO build supplied by Asylum Research. Elastic properties of ECM  
602 were reckoned using the Hertz model. A Poisson's ratio of 0.5 was used in the calculation of the  
603 Young's elastic modulus.

## 604 **Western blotting**

605 Snap frozen tissues were ground while frozen and lysed in 2% SDS containing protease and  
606 phosphatase inhibitor. Samples were boiled for 5 minutes (95°C) and loaded onto the SDS-  
607 polyacrylamide gel, and protein was separated at 110 constant volts.

608 The protein was transferred onto a pre-wet polyvinylidene difluoride (PVDF) membrane (100%  
609 methanol, 1 minute) at 250 mA for 2 hours. The PVDF membrane was rinsed with TBST and

610 non-specific binding was blocked with 5% nonfat dry milk dissolved in TBST. The membrane  
611 was then incubated with the primary antibody overnight at 4°C, washed with TBST, incubated  
612 with horseradish-peroxidase conjugated secondary antibody (1 hour, room temperature; dilution  
613 1:5000), washed with TBST, and detected with the chemiluminescence system Quantum HRP  
614 substrate (Advansta #K-12042). Quantification was performed using gel densitometry in  
615 ImageJ. Primary antibodies used are anti-LOX (1:1000, Abcam Cat# ab174316) and anti-E-  
616 cadherin (1:1000, Cell Signlaing Cat#3195).

### 617 **Flow cytometry**

618 Mouse tissue was harvested and chopped with a razor blade. Chopped tissue was digested in  
619 100 U/mL Collagenase Type 1 (Worthington Biochemical Corporation, Cat# LS004196), 500  
620 U/mL Collagenase Type 4 (Worthington Biochemical Corporation, Cat# LS004188), and 200  
621 µg/mL DNase I (Roche, Cat# 10104159001) while shaking at 37°C. Digested tissue was filtered  
622 using a 100 µm filter to remove remaining pieces. Red blood cells were lysed in ammonium-  
623 chloride-potassium buffer and remaining cells were counted. Cells were stained with  
624 fluorophore-conjugated primary antibodies for 30 minutes on ice and subsequently stained with  
625 a viability marker. Antibodies used for staining were anti-mouse CD24-PE (BD Pharmingen,  
626 Cat# 553262), anti-mouse TER-119-APC (BioLegend, Cat# 116212), anti-mouse CD45-APC  
627 (BioLegend, Cat# 103112), anti-mouse CD29-AF700 (BioLegend, Cat# 102218), anti-mouse  
628 Ly6G-BV421 (BioLegend, Cat# 127628), anti-mouse F4/80-BV510 (BioLegend, Cat# 123135),  
629 anti-mouse CD29-AF488 (BioLegend, Cat# 102212), anti-mouse CD140a-PE (BioLegend, Cat#  
630 135906), anti-mouse CD31-APC (BioLegend, Cat# 102410), anti-mouse CD11c-BV605 (BD  
631 Pharmingen, Cat# 563057), anti-mouse CD24-BV650 (BD Pharmingen, Cat# 563545), anti-  
632 mouse CD11b-PerCP-Cy5.5 (eBiosciences, Cat# 45-0112-82), anti-mouse CD45-AF700  
633 (BioLegend, Cat# 103128), anti-mouse Ly6C-BV711 (BioLegend, Cat# 128037), anti-mouse

634 MHCII-PE-Cy7 (BioLegend, Cat# 107630), and Zombie NIR Fixable Viability Dye (BioLegend,  
635 Cat# 423105). Cells were then analyzed on a flow cytometer.

### 636 **Patient gene expression analysis**

637 For the stroma and epithelium specific gene expression analysis, the breast cancer datasets  
638 from Finak *et al.* 2008 and Gruosso *et al.* 2019 have been used. Briefly, whole Human Genome  
639 44 K arrays (Agilent Technologies, product G4112A) were used for stroma and epithelial  
640 expression profiles. Details of laser capture microdissection, RNA extraction, labeling,  
641 hybridization, scanning and quality filters are described in Finak *et al.*, 2006 and 2008. Briefly,  
642 the dataset was normalized using loess (within-array) and quantile (between-array)  
643 normalization. Probes were ranked by Inter-quartile range (IQR) values, and the most variable  
644 probe per gene across expression data were selected for further analysis. Replicate arrays with  
645 a concordance above 0.944 were averaged before assessing differential expression.

646 An association between PLOD2 and distant metastasis-free survival (DMFS) has been  
647 determined using an online tool (<http://xena.ucsc.edu>) to download GEO data (GSE2034,  
648 GSE5327, and GSE7390) from 683 patients analyzed on Affymetrix U133A platform as  
649 described in Yau *et al.*(46). Patients have been excluded from analyses if their molecular  
650 subtyping of ER/HER2 status and PAM50 did not align: ER+/HER2- must always be luminal,  
651 ER+ or-/HER2+ must be HER2+, and ER-/HER2- must always be basal-like. PLOD2 expression  
652 levels have been divided based on the median for each tumor subtype: ER+/HER2- (low n=157;  
653 high=157), ER- or +/HER2+ (low n=36; high=37), and ER-/HER2- (low n=66; high=67). All  
654 statistical analyses were done using GraphPad Prism Version 6.01: Kruskal-Wallis one-way  
655 ANOVA test was applied to assess the relationship in PLOD2 expression levels among tumor  
656 subtypes and log rank P value (Mantel-Cox) tests for DMFS curves.

657 An association between PLOD2 gene expression and relapse-free survival (RFS) has been  
658 determined using an online tool (<http://kmplot.com/analysis/>) from 1,809 patients analyzed on

659 Affymetrix platform (HGU133A and HGU133+2 microarrays)(47). Affymetrix ID 202619 or  
660 202620 were used for PLOD2 probes (2014 version) in these analyses. All breast cancer  
661 patients in this database were included regardless to lymph node status, TP53 status, or grade.  
662 No restrictions were placed in term of patient treatment. PLOD2 expression levels have been  
663 divided based on the median for each tumor subtype: ER+/PR+/HER2- (low n=170; high=169),  
664 ER-/PR-/HER2+ (low n=58; high=57), and ER-/PR-/HER- (low n=128; high=127). Hazard ratio  
665 (and 95% confidence intervals) and log rank P values were calculated and displayed once the  
666 data were plotted using the online tool.

667 The cBioPortal for Cancer Genomics was used to determine the levels of LOX, PLOD2, and  
668 LOXL2 gene expression in breast cancer patients segregated by ER and HER2 status(59,60).  
669 ER, PR, and HER2 status were determined by gene expression levels. Samples positive for  
670 both ER/PR and HER2 overexpression were excluded from subtype analysis. The cBioPortal  
671 was also used to assess gene expression associations of LOX, PLOD2, and LOXL2 with HIF1A,  
672 CCL2, CD163, and CD68. All data accessed via cBioPortal are from the 1904 patients in the  
673 METABRIC dataset analyzed for gene expression by Illumina human v3 microarray(61). All  
674 1904 samples were included in correlation analyses.

## 675 **Statistical analysis**

676 GraphPad Prism Version 6.01 was used to perform all statistical analyses with the exception of  
677 LH2 IHC and RFS correlations with PLOD2. Statistical significance was determined using the  
678 appropriate tests as noted in the figure legends or method section.

## 679 **LH2 IHC and prognostic analyses:**

### 680 *Study population*

681 The female Malmö Diet and Cancer Study (MDCS) cohort consists of women born 1923–  
682 1950)(62,63). Information on incident breast cancer is annually retrieved from the Swedish  
683 Cancer Registry and the South Swedish Regional Tumor Registry. Follow-up until December  
684 31, 2010, identified a total of 910 women with incident breast cancer, the following conditions

685 excluded patients: 1) with in situ only cancers (n=68), 2) who received neo-adjuvant treatments  
686 (n=4), 3) with distant metastasis at diagnosis (n=14), 4) those who died from breast cancer-  
687 related causes  $\leq 0.3$  years from diagnosis (n=2), and finally 5) patients with bilateral cancers  
688 (n=17). In addition, one patient who declined treatment for four years before accepting surgery  
689 was excluded. Patient characteristics at diagnosis and pathological tumor data were obtained  
690 from medical records. Information on cause of death and vital status was retrieved from the  
691 Swedish Causes of Death Registry, with last follow-up December 31st, 2014. Ethical permission  
692 was obtained from the Ethical Committee at Lund University (Dnr 472/2007). All participants  
693 originally signed a written informed consent form.

#### 694 *Tumor evaluation*

695 Tumor samples from incident breast cancer cases in MDCS were collected, and a tissue  
696 microarray (TMA) including two 1-mm cores from each tumor was constructed (Beecher, WI,  
697 USA). Within the study population (N=910), tumor tissue cores were accessible from 718  
698 patients. Four- $\mu$ m sections dried for one hour in 60°C were automatically pretreated using the  
699 Autostainer plus, DAKO staining equipment with Dako kit K8010 (Dako, DK). A primary mouse  
700 monoclonal Lysyl Hydroxylase 2 (LH2) antibody (Origene; Cat# TA803224, dilution 1:150) was  
701 used for the immunohistochemical staining.

702 TMA cores were analyzed by a cohort of 4 anatomic pathologists (ACN, AC, JG, AN) using the  
703 PathXL digital pathology system (<http://www.pathxl.com>, PathXL Ltd., UK) blinded to all other  
704 clinical and pathologic variables. Immunohistochemistry for LH2 was assessed separately for  
705 stromal and neoplastic epithelial components of the tumors. Stromal LH2 staining was assessed  
706 with the semi-quantitative H-score which combines intensity and proportion positive  
707 assessments into a continuous variable from 0-300(64). Cellular stromal components were  
708 assessed (including fibroblasts, macrophages, endothelial cells, adipocytes, and other stromal  
709 cell types) while areas of significant lymphocytic infiltrate were specifically excluded from the  
710 percent positive estimation. Neoplastic epithelial LH2 staining intensity was scored 0-3+ based

711 on the predominant intensity pattern in the tumor — invasive tumor cells did not display  
712 significant intra-tumoral heterogeneity of LH2 staining within each core. Verification of inter-  
713 observer reproducibility for the H-score was established in a training series of 16 cases  
714 evaluated by all study pathologists to harmonize scoring. Inter-observer agreement in the  
715 training set was very high, evaluating the IHC scores both as continuous variables (Pearson  
716 correlation coefficients ranging from 0.912-0.9566, all p values < 0.0001), and after  
717 transformation into categorical data (negative, low, and moderate/high; weighted kappa  
718 coefficients ranging from 0.673-0.786). In addition, 50 cases of the study cohort were evaluated  
719 blindly by two pathologists to confirm data fidelity; the Pearson correlation coefficient = 0.7507  
720 ( $p = 5.7 \text{ E-}05$ ), considered a strong level of agreement.

721 After exclusion of cases for which LH2 was not evaluable on the TMA, H-scores for 505 patients  
722 were included for statistical associations with clinicopathologic features and patient outcome.  
723 Each patient was represented by two cores, and TMA core 1 and core 2 were merged into a  
724 joint variable favoring the highest stromal LH2 H-score or epithelial LH2 intensity because we  
725 predict that higher H-score would drive patient outcome in accordance with our gene expression  
726 data demonstrating high LH2 expression correlated with poor outcome. The Pearson correlation  
727 coefficient between cores = 0.647, demonstrating moderate agreement among the stromal LH2  
728 H-scores for the two cores. In cases with only one TMA core providing a LH2 score, the  
729 expression of this core was used. Further, the joint stromal LH2 variable was categorized into  
730 tertiles based on the study population with valid LH2 annotation (N=505). The lowest tertile of  
731 LH2 H-scores were defined as scores between 0 and less or equal to 120 (N=171), the  
732 intermediate H-score as above 120 and equal or less than 230 (N=188), and the highest stromal  
733 LH2 score as above 230 (N=146).

#### 734 *Statistical analyses for LH2 IHC analyses*

735 Patient and tumor characteristics at diagnosis in relation to stromal LH2 expression were  
736 categorized and presented as percentages. Continuous variables are presented as the mean

737 and min/max. The associations between LH2 expression and grade or tumor size, respectively,  
738 were analyzed through linear-by-linear association. The association between LH2 expression  
739 and prognosis was examined using breast cancer-specific mortality as endpoint, which was  
740 defined as the incidence of breast cancer-related death. Follow-up was calculated from the date  
741 of breast cancer diagnosis to the date of breast cancer-related death, date of death from  
742 another cause, date of emigration or the end of follow-up as of December 31st, 2014. Main  
743 analyses included the overall population; additional analyses were performed in subgroup  
744 analyses stratified by estrogen receptor (ER) or axillary lymph node involvement (ALNI) status.  
745 The prognostic impact of stromal LH2 expression was analyzed through Cox proportional  
746 hazards analyses, which yielded hazard ratios (HR) and 95% confidence intervals (CI) for crude  
747 models, and multivariate models adjusted for age at diagnosis (model 1) and tumor  
748 characteristics ER (dichotomized, cut-off 10% stained nuclei), ALNI (none or any positive lymph  
749 node involvement), histological grade (Nottingham grade I-III), and tumor size (dichotomized  
750 using cut-off 20 mm). Kaplan-Meier curves including the LogRank test indicated LH2 status to  
751 particularly impact the first 10 years after diagnosis and survival variables constructed to  
752 capture these effects were used in Cox regression models investigating the effects during the  
753 first post-diagnostic decade. All statistical analyses were performed in SPSS version 22.0  
754 (IBM).  
755

756 **Author Contributions**

757 V.M.W., K.C.H., O.M., A.S.B., and A.P.D. conceived the project, prepared figures and wrote the  
758 manuscript. A.S.B, T.P., T.N., and K.C.H. developed the xAAA method and A.S.B performed all  
759 LC-MS and LC-PRM experiments. J.N.L generated the TetO\_mLOX mouse model. O.M.  
760 designed and conducted *in vivo* experiments using inducible LOX overexpression models. B.R.  
761 and L.C. designed and conducted CSF1 blocking antibody mouse experiment. O.M. and A.P.D.  
762 performed and quantified immunofluorescence, H&E, PS and SHG imaging and analyses on  
763 mouse tissue samples. I.A., A.P.D., and J.M.B performed AFM on human or mouse tissue  
764 specimens. I.A. performed SHG imaging on human tissue. E.S.H, and P.K. provided human  
765 breast tumor biopsies for xAAA. B.R. and L.C. designed and conducted immunoprofiling on  
766 human breast tumor via flow cytometry. O.M. and A.P.D. performed all gene expression  
767 analyses with the exception of Fig. 5g-j. T.G, H.K. and M.P. performed gene expression  
768 analyses gene expression in microdissected epithelial and stromal compartments of human  
769 invasive breast carcinomas. O.M. and A.P.D. designed and conducted *in vivo* experiments  
770 using minoxidil treatment. S.B. established and managed MDCS cohort used for LH2 IHC. Z.W.  
771 and S.B. performed LH2 IHC. A.C.N. designed scoring schemes for stromal and neoplastic  
772 epithelial LH2 IHC, and A.C.N, A.N., J.G., and A.C. scored all human biopsies. S.B., O.B.,  
773 A.C.N., O.M., and V.M.W analyzed and interpreted clinical data from LH2 scores.

774 **Acknowledgements:**

775 We thank J. Northcott for writing the ImageJ Macro, L. Korets for mouse husbandry and N.  
776 Korets for histology support, as well as K. Lövgren and S. Baker for LH2 immunostaining on  
777 patient biopsies. The work was supported by investigator grants through the US National  
778 Cancer Institute R33 CA183685 (K.C.H & V.M.W) and R01CA192914 and CA174929 to  
779 (V.M.W), and R01CA222508-01 to (V.M.W. and E.S.H.), as well as US DOD Breast Cancer  
780 Research Program (BCRP) grant BC122990 (V.M.W). Trainee support was provided by US  
781 DOD BCRP grant BC130501 (O.M.), US NIH grants TL1 TR001081 & US NIH T32 HL007171



782 (A.S.B), and US NIH T32 grant CA 108462 (O.M.). Funding from Eastern Star Scholar-  
783 Minnesota Masonic Cancer Center (A.C.N.), the Swedish Research Council (S.B. & C.H.) and  
784 US NIH R01 CA057621 (Z.W.) also supported the work.

## References:

- 785 1. Laklai H, Miroshnikova YA, Pickup MW, Collisson EA, Kim GE, Barrett AS, *et al.*  
786 Genotype tunes pancreatic ductal adenocarcinoma tissue tension to induce matricellular  
787 fibrosis and tumor progression. *Nat Med* **2016**;22(5):497-505 doi 10.1038/nm.4082.
- 788 2. Acerbi I, Cassereau L, Dean I, Shi Q, Au A, Park C, *et al.* Human breast cancer invasion  
789 and aggression correlates with ECM stiffening and immune cell infiltration. *Integr Biol*  
790 (Camb) **2015**;7(10):1120-34 doi 10.1039/c5ib00040h.
- 791 3. Dvorak HF. Tumors: wounds that do not heal. Similarities between tumor stroma  
792 generation and wound healing. *N Engl J Med* **1986**;315(26):1650-9 doi  
793 10.1056/NEJM198612253152606.
- 794 4. Conklin MW, Eickhoff JC, Riching KM, Pehlke CA, Eliceiri KW, Provenzano PP, *et al.*  
795 Aligned collagen is a prognostic signature for survival in human breast carcinoma. *The*  
796 *American journal of pathology* **2011**;178(3):1221-32 doi 10.1016/j.ajpath.2010.11.076.
- 797 5. Olive KP, Jacobetz MA, Davidson CJ, Gopinathan A, McIntyre D, Honess D, *et al.*  
798 Inhibition of Hedgehog signaling enhances delivery of chemotherapy in a mouse model  
799 of pancreatic cancer. *Science* **2009**;324(5933):1457-61 doi 10.1126/science.1171362.
- 800 6. Provenzano PP, Cuevas C, Chang AE, Goel VK, Von Hoff DD, Hingorani SR. Enzymatic  
801 targeting of the stroma ablates physical barriers to treatment of pancreatic ductal  
802 adenocarcinoma. *Cancer Cell* **2012**;21(3):418-29 doi 10.1016/j.ccr.2012.01.007.
- 803 7. Netti PA, Berk DA, Swartz MA, Grodzinsky AJ, Jain RK. Role of extracellular matrix  
804 assembly in interstitial transport in solid tumors. *Cancer Res* **2000**;60(9):2497-503.
- 805 8. Jain RK, Lee JJ, Hong D, Kurzrock R. Reply to A. Levy *et al.* *J Clin Oncol*  
806 **2013**;31(3):396 doi 10.1200/JCO.2012.46.4867.
- 807 9. Egeblad M, Rasch MG, Weaver VM. Dynamic interplay between the collagen scaffold  
808 and tumor evolution. *Curr Opin Cell Biol* **2010**;22(5):697-706 doi  
809 10.1016/j.ceb.2010.08.015.
- 810 10. Chaudhuri O, Koshy ST, Branco da Cunha C, Shin JW, Verbeke CS, Allison KH, *et al.*  
811 Extracellular matrix stiffness and composition jointly regulate the induction of malignant  
812 phenotypes in mammary epithelium. *Nat Mater* **2014**;13(10):970-8 doi  
813 10.1038/nmat4009.
- 814 11. Provenzano PP, Inman DR, Eliceiri KW, Keely PJ. Matrix density-induced  
815 mechanoregulation of breast cell phenotype, signaling and gene expression through a  
816 FAK-ERK linkage. *Oncogene* **2009**;28(49):4326-43.
- 817 12. Levental KR, Yu H, Kass L, Lakins JN, Egeblad M, Erler JT, *et al.* Matrix crosslinking  
818 forces tumor progression by enhancing integrin signaling. *Cell* **2009**;139(5):891-906.
- 819 13. Mekhdjian AH, Kai F, Rubashkin MG, Prahls LS, Przybyla LM, McGregor AL, *et al.*  
820 Integrin-mediated traction force enhances paxillin molecular associations and adhesion  
821 dynamics that increase the invasiveness of tumor cells into a three-dimensional  
822 extracellular matrix. *Mol Biol Cell* **2017**;28(11):1467-88 doi 10.1091/mbc.E16-09-0654.
- 823 14. Pickup MW, Laklai H, Acerbi I, Owens P, Gorska AE, Chytil A, *et al.* Stromally derived  
824 lysyl oxidase promotes metastasis of transforming growth factor-beta-deficient mouse  
825 mammary carcinomas. *Cancer Res* **2013**;73(17):5336-46 doi 10.1158/0008-5472.CAN-  
826 13-0012.

- 827 15. Pickup MW, Mouw JK, Weaver VM. The extracellular matrix modulates the hallmarks of  
828 cancer. *EMBO Rep* **2014**;15(12):1243-53 doi 10.15252/embr.201439246.
- 829 16. Provenzano PP, Inman DR, Eliceiri KW, Knittel JG, Yan L, Rueden CT, *et al.* Collagen  
830 density promotes mammary tumor initiation and progression. *BMC Med* **2008**;6:11 doi  
831 1741-7015-6-11 [pii]  
10.1186/1741-7015-6-11.
- 832 17. Eyre DR, Weis MA, Wu J-J. Advances in collagen cross-link analysis. *Methods*  
833 **2008**;45(1):65-74.
- 834 18. Mammoto T, Ingber DE. Mechanical control of tissue and organ development.  
835 *Development* **2010**;137(9):1407-20.
- 836 19. Yamauchi M, Shiiba M. Lysine hydroxylation and cross-linking of collagen. *Post-*  
837 *translational Modifications of Proteins* **2008**:95-108.
- 838 20. Yamauchi M, Sricholpech M. Lysine post-translational modifications of collagen. *Essays*  
839 *in biochemistry* **2012**;52:113-33.
- 840 21. Miller BW, Morton JP, Pinese M, Saturno G, Jamieson NB, McGhee E, *et al.* Targeting  
841 the LOX/hypoxia axis reverses many of the features that make pancreatic cancer  
842 deadly: inhibition of LOX abrogates metastasis and enhances drug efficacy. *EMBO Mol*  
843 *Med* **2015**;7(8):1063-76 doi 10.15252/emmm.201404827.
- 844 22. Erler JT, Weaver VM. Three-dimensional context regulation of metastasis. *Clin Exp*  
845 *Metastasis* **2009**;26(1):35-49 doi 10.1007/s10585-008-9209-8.
- 846 23. Chen Y, Terajima M, Yang Y, Sun L, Ahn Y-H, Pankova D, *et al.* Lysyl hydroxylase 2  
847 induces a collagen cross-link switch in tumor stroma. *The Journal of clinical investigation*  
848 **2015**;125(3):1147.
- 849 24. Gilkes DM, Bajpai S, Wong CC, Chaturvedi P, Hubbi ME, Wirtz D, *et al.* Procollagen  
850 lysyl hydroxylase 2 is essential for hypoxia-induced breast cancer metastasis. *Molecular*  
851 *cancer research* **2013**;11(5):456-66.
- 852 25. Erler JT, Bennewith KL, Nicolau M, Dornhofer N, Kong C, Le QT, *et al.* Lysyl oxidase is  
853 essential for hypoxia-induced metastasis. *Nature* **2006**;440(7088):1222-6 doi  
854 10.1038/nature04695.
- 855 26. Lampi MC, Reinhart-King CA. Targeting extracellular matrix stiffness to attenuate  
856 disease: From molecular mechanisms to clinical trials. *Sci Transl Med* **2018**;10(422) doi  
857 10.1126/scitranslmed.aao0475.
- 858 27. Grivennikov SI, Greten FR, Karin M. Immunity, inflammation, and cancer. *Cell*  
859 **2010**;140(6):883-99 doi 10.1016/j.cell.2010.01.025.
- 860 28. Mack M. Inflammation and fibrosis. *Matrix Biol* **2018**;68-69:106-21 doi  
861 10.1016/j.matbio.2017.11.010.
- 862 29. Wick G, Grundtman C, Mayerl C, Wimpfissinger TF, Feichtinger J, Zelger B, *et al.* The  
863 immunology of fibrosis. *Annu Rev Immunol* **2013**;31:107-35 doi 10.1146/annurev-  
864 immunol-032712-095937.
- 865 30. Ueha S, Shand FH, Matsushima K. Cellular and molecular mechanisms of chronic  
866 inflammation-associated organ fibrosis. *Front Immunol* **2012**;3:71 doi  
867 10.3389/fimmu.2012.00071.
- 868 31. Sun X, Glynn DJ, Hodson LJ, Huo C, Britt K, Thompson EW, *et al.* CCL2-driven  
869 inflammation increases mammary gland stromal density and cancer susceptibility in a  
870 transgenic mouse model. *Breast Cancer Res* **2017**;19(1):4 doi 10.1186/s13058-016-  
871 0796-z.
- 872 32. Qian BZ, Li J, Zhang H, Kitamura T, Zhang J, Campion LR, *et al.* CCL2 recruits  
873 inflammatory monocytes to facilitate breast-tumour metastasis. *Nature*  
874 **2011**;475(7355):222-5 doi 10.1038/nature10138.
- 875

- 876 33. Lohela M, Casbon AJ, Olow A, Bonham L, Branstetter D, Weng N, *et al*. Intravital  
877 imaging reveals distinct responses of depleting dynamic tumor-associated macrophage  
878 and dendritic cell subpopulations. *Proc Natl Acad Sci U S A* **2014**;111(47):E5086-95 doi  
879 10.1073/pnas.1419899111.
- 880 34. Ruffell B, Chang-Strachan D, Chan V, Rosenbusch A, Ho CM, Pryer N, *et al*.  
881 Macrophage IL-10 blocks CD8+ T cell-dependent responses to chemotherapy by  
882 suppressing IL-12 expression in intratumoral dendritic cells. *Cancer Cell* **2014**;26(5):623-  
883 37 doi 10.1016/j.ccell.2014.09.006.
- 884 35. DeNardo DG, Brennan DJ, Rexhepaj E, Ruffell B, Shiao SL, Madden SF, *et al*.  
885 Leukocyte complexity predicts breast cancer survival and functionally regulates  
886 response to chemotherapy. *Cancer Discov* **2011**;1(1):54-67 doi 10.1158/2159-8274.CD-  
887 10-0028.
- 888 36. Nemkov T, D'Alessandro A, Hansen KC. Three-minute method for amino acid analysis  
889 by UHPLC and high-resolution quadrupole orbitrap mass spectrometry. *Amino acids*  
890 **2015**;47(11):2345-57.
- 891 37. Oxlund H, Barckman M, Ørtoft G, Andreassen T. Reduced concentrations of collagen  
892 cross-links are associated with reduced strength of bone. *Bone* **1995**;17(4):S365-S71.
- 893 38. Gruosso T, Gigoux M, Manem VSK, Bertos N, Zuo D, Perlitch I, *et al*. Spatially distinct  
894 tumor immune microenvironments stratify triple-negative breast cancers. *J Clin Invest*  
895 **2019**;129(4):1785-800 doi 10.1172/JCI96313.
- 896 39. Finak G, Bertos N, Pepin F, Sadekova S, Souleimanova M, Zhao H, *et al*. Stromal gene  
897 expression predicts clinical outcome in breast cancer. *Nat Med* **2008**;14(5):518-27 doi  
898 10.1038/nm1764.
- 899 40. Salvador F, Martin A, Lopez-Menendez C, Moreno-Bueno G, Santos V, Vazquez-  
900 Naharro A, *et al*. Lysyl oxidase-like protein LOXL2 promotes lung metastasis of breast  
901 cancer. *Cancer Res* **2017** doi 10.1158/0008-5472.CAN-16-3152.
- 902 41. Eyre DR, Paz MA, Gallop PM. Cross-linking in collagen and elastin. *Annual review of*  
903 *biochemistry* **1984**;53(1):717-48.
- 904 42. Lin EY, Nguyen AV, Russell RG, Pollard JW. Colony-stimulating factor 1 promotes  
905 progression of mammary tumors to malignancy. *J Exp Med* **2001**;193(6):727-39 doi DOI  
906 10.1084/jem.193.6.727.
- 907 43. Strachan DC, Ruffell B, Oei Y, Bissell MJ, Coussens LM, Pryer N, *et al*. CSF1R  
908 inhibition delays cervical and mammary tumor growth in murine models by attenuating  
909 the turnover of tumor-associated macrophages and enhancing infiltration by CD8(+) T  
910 cells. *Oncoimmunology* **2013**;2(12):e26968 doi 10.4161/onci.26968.
- 911 44. Lin EY, Jones JG, Li P, Zhu L, Whitney KD, Muller WJ, *et al*. Progression to malignancy  
912 in the polyoma middle T oncoprotein mouse breast cancer model provides a reliable  
913 model for human diseases. *Am J Pathol* **2003**;163(5):2113-26 doi 10.1016/S0002-  
914 9440(10)63568-7.
- 915 45. Takaluoma K, Lantto J, Myllyharju J. Lysyl hydroxylase 2 is a specific telopeptide  
916 hydroxylase, while all three isoenzymes hydroxylate collagenous sequences. *Matrix*  
917 *biology* **2007**;26(5):396-403.
- 918 46. Yau C, Esserman L, Moore DH, Waldman F, Sninsky J, Benz CC. A multigene predictor  
919 of metastatic outcome in early stage hormone receptor-negative and triple-negative  
920 breast cancer. *Breast Cancer Res* **2010**;12(5):R85 doi 10.1186/bcr2753.
- 921 47. Gyorffy B, Lanczky A, Eklund AC, Denkert C, Budczies J, Li Q, *et al*. An online survival  
922 analysis tool to rapidly assess the effect of 22,277 genes on breast cancer prognosis  
923 using microarray data of 1,809 patients. *Breast Cancer Res Treat* **2010**;123(3):725-31  
924 doi 10.1007/s10549-009-0674-9.
- 925 48. Noy R, Pollard JW. Tumor-associated macrophages: from mechanisms to therapy.  
926 *Immunity* **2014**;41(1):49-61 doi 10.1016/j.immuni.2014.06.010.

- 927 49. Lin EY, Li JF, Gnatovskiy L, Deng Y, Zhu L, Grzesik DA, *et al.* Macrophages regulate the  
928 angiogenic switch in a mouse model of breast cancer. *Cancer Res* **2006**;66(23):11238-  
929 46 doi 10.1158/0008-5472.CAN-06-1278.
- 930 50. Gilkes DM, Bajpai S, Chaturvedi P, Wirtz D, Semenza GL. Hypoxia-inducible factor 1  
931 (HIF-1) promotes extracellular matrix remodeling under hypoxic conditions by inducing  
932 P4HA1, P4HA2, and PLOD2 expression in fibroblasts. *J Biol Chem* **2013**;288(15):10819-  
933 29 doi 10.1074/jbc.M112.442939.
- 934 51. Wong CC, Gilkes DM, Zhang H, Chen J, Wei H, Chaturvedi P, *et al.* Hypoxia-inducible  
935 factor 1 is a master regulator of breast cancer metastatic niche formation. *Proc Natl*  
936 *Acad Sci U S A* **2011**;108(39):16369-74 doi 10.1073/pnas.1113483108.
- 937 52. van der Slot AJ, Zuurmond A-M, Bardoel AF, Wijmenga C, Pruijs HE, Sillence DO, *et al.*  
938 Identification of PLOD2 as telopeptide lysyl hydroxylase, an important enzyme in  
939 fibrosis. *Journal of Biological Chemistry* **2003**;278(42):40967-72.
- 940 53. Lu P, Takai K, Weaver VM, Werb Z. Extracellular matrix degradation and remodeling in  
941 development and disease. *Cold Spring Harb Perspect Biol* **2011**;3(12) doi  
942 10.1101/cshperspect.a005058.
- 943 54. Ahn Y, Sanderson BW, Klein OD, Krumlauf R. Inhibition of Wnt signaling by Wise  
944 (Sostdc1) and negative feedback from Shh controls tooth number and patterning.  
945 *Development* **2010**;137(19):3221-31 doi 10.1242/dev.054668.
- 946 55. Hsiao EC, Boudignon BM, Chang WC, Bencsik M, Peng J, Nguyen TD, *et al.* Osteoblast  
947 expression of an engineered Gs-coupled receptor dramatically increases bone mass.  
948 *Proc Natl Acad Sci U S A* **2008**;105(4):1209-14 doi 10.1073/pnas.0707457105.
- 949 56. Guy CT, Cardiff RD, Muller WJ. Induction of mammary tumors by expression of  
950 polyomavirus middle T oncogene: a transgenic mouse model for metastatic disease. *Mol*  
951 *Cell Biol* **1992**;12(3):954-61.
- 952 57. Avery NC, Sims TJ, Bailey AJ. Quantitative determination of collagen cross-links.  
953 *Extracellular Matrix Protocols: Second Edition* **2009**:103-21.
- 954 58. Clasquin MF, Melamud E, Rabinowitz JD. LC-MS Data Processing with MAVEN: A  
955 Metabolomic Analysis and Visualization Engine. *Current Protocols in Bioinformatics*  
956 **2012**:14.1. 1-.1. 23.
- 957 59. Cerami E, Gao J, Dogrusoz U, Gross BE, Sumer SO, Aksoy BA, *et al.* The cBio cancer  
958 genomics portal: an open platform for exploring multidimensional cancer genomics data.  
959 *Cancer Discov* **2012**;2(5):401-4 doi 10.1158/2159-8290.CD-12-0095.
- 960 60. Gao J, Aksoy BA, Dogrusoz U, Dresdner G, Gross B, Sumer SO, *et al.* Integrative  
961 analysis of complex cancer genomics and clinical profiles using the cBioPortal. *Sci*  
962 *Signal* **2013**;6(269):pl1 doi 10.1126/scisignal.2004088.
- 963 61. Curtis C, Shah SP, Chin SF, Turashvili G, Rueda OM, Dunning MJ, *et al.* The genomic  
964 and transcriptomic architecture of 2,000 breast tumours reveals novel subgroups. *Nature*  
965 **2012**;486(7403):346-52 doi 10.1038/nature10983.
- 966 62. Berglund G, Elmstahl S, Janzon L, Larsson SA. The Malmo Diet and Cancer Study.  
967 Design and feasibility. *J Intern Med* **1993**;233(1):45-51.
- 968 63. Manjer J, Carlsson S, Elmstahl S, Gullberg B, Janzon L, Lindstrom M, *et al.* The Malmo  
969 Diet and Cancer Study: representativity, cancer incidence and mortality in participants  
970 and non-participants. *Eur J Cancer Prev* **2001**;10(6):489-99.
- 971 64. Cohen DA, Dabbs DJ, Cooper KL, Amin M, Jones TE, Jones MW, *et al.* Interobserver  
972 agreement among pathologists for semiquantitative hormone receptor scoring in breast  
973 carcinoma. *Am J Clin Pathol* **2012**;138(6):796-802 doi 10.1309/AJCP6DKRND5CKVDD.

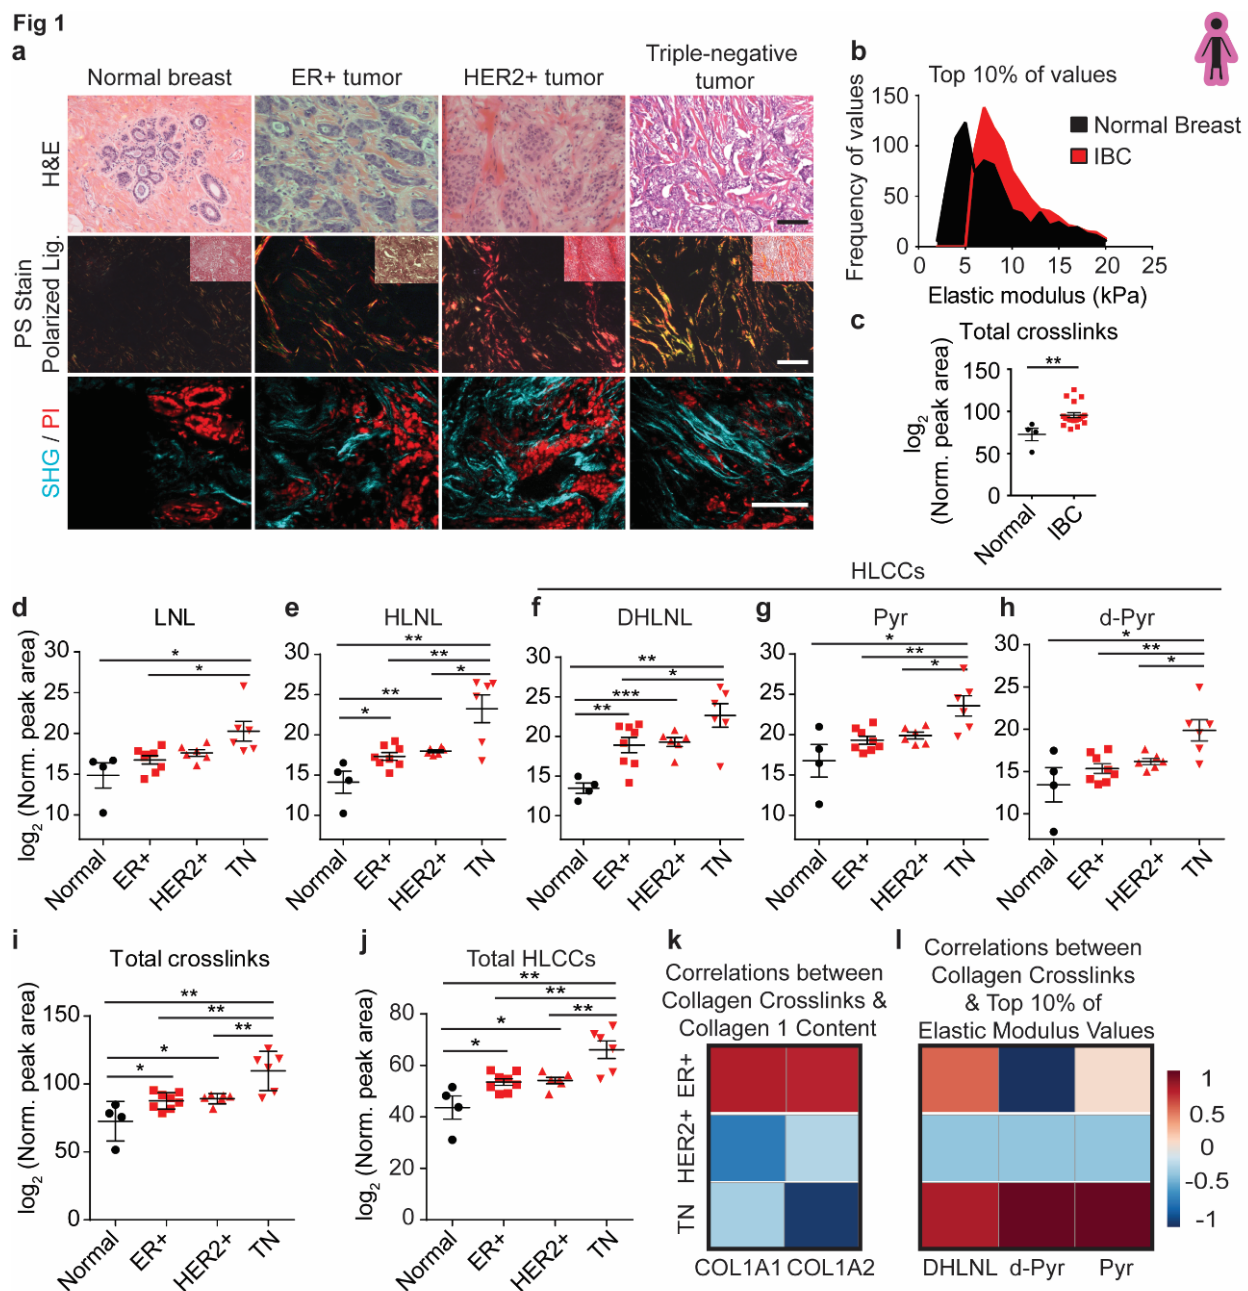

**Figure 1: Hydroxylysine collagen crosslink abundance correlates with human breast cancer aggression** (a) Representative images of normal breast tissue (normal breast;  $n = 4$ ) and invasive tumors diagnosed as estrogen receptor positive (ER+ tumor;  $n = 8$ ), epidermal growth factor receptor two positive (HER2+ tumor;  $n = 6$ ) and triple negative (TN tumor;  $n = 6$ ). (**Top row**) Brightfield images of human breast tissue stained with hematoxylin and eosin (H&E). (**Middle row**) Polarized light images of picosirius red (PS) stained human breast tissue with an inset brightfield image shows relative levels of fibrillar collagen. (**Bottom row**) Two photon second harmonic generation (SHG) images of human breast tissue revealing collagen organization

(turquoise) and propidium iodide (PI; red) stained nuclei. Scale bar, 100  $\mu\text{m}$ . **(b)** The distribution of the top 10% of elastic modulus values of normal breast tissue ( $n = 10$ ) and invasive breast carcinoma (IBC;  $n = 10$ ) measured by AFM microindentation. Statistical analysis was performing using Mann-Whitney U test ( $****p < 0.0001$ ). **(c)** Quantification of the abundance of all detected collagen crosslinks in normal breast tissue ( $n = 4$ ) and in IBC tissues ( $n = 19$ ) plotted as a scatter plot of individual samples with mean  $\pm$  SEM. Statistical analysis was performed using Mann-Whitney U test ( $**p < 0.01$ ). **(d-h)** Scatter plots showing individual and mean values  $\pm$  SEM of the levels of each LCC and HLCC crosslink measured in normal breast tissues, and in ER+, HER2+ and TN breast tumors. The total abundance of crosslinks **(i)** was calculated by summing all individual crosslinks and the total tissue HLCC abundance **(j)** was calculated by summing DHLNL, Pyr, and d-Pyr and plotted as individual and mean values  $\pm$  SEM. All crosslink values are normalized to total collagen content (i.e. hydroxyproline abundance) and wet tissue weight and are plotted as  $\log_2$  transformed normalized peak areas from LC-MS data. Statistical analysis of crosslinks was performed using one-way ANOVA test for overall analysis and unpaired t-test was used for individual comparisons ( $*p < 0.05$ ;  $**p < 0.01$ ). **(k,l)** Heat maps of Spearman correlation coefficients indicating correlations between levels of total collagen crosslinks and collagen I content **(k)** and between levels of each HLCC and the top 10% of elastic modulus measurements **(l)** stratified by tumor subtype.

Fig 2

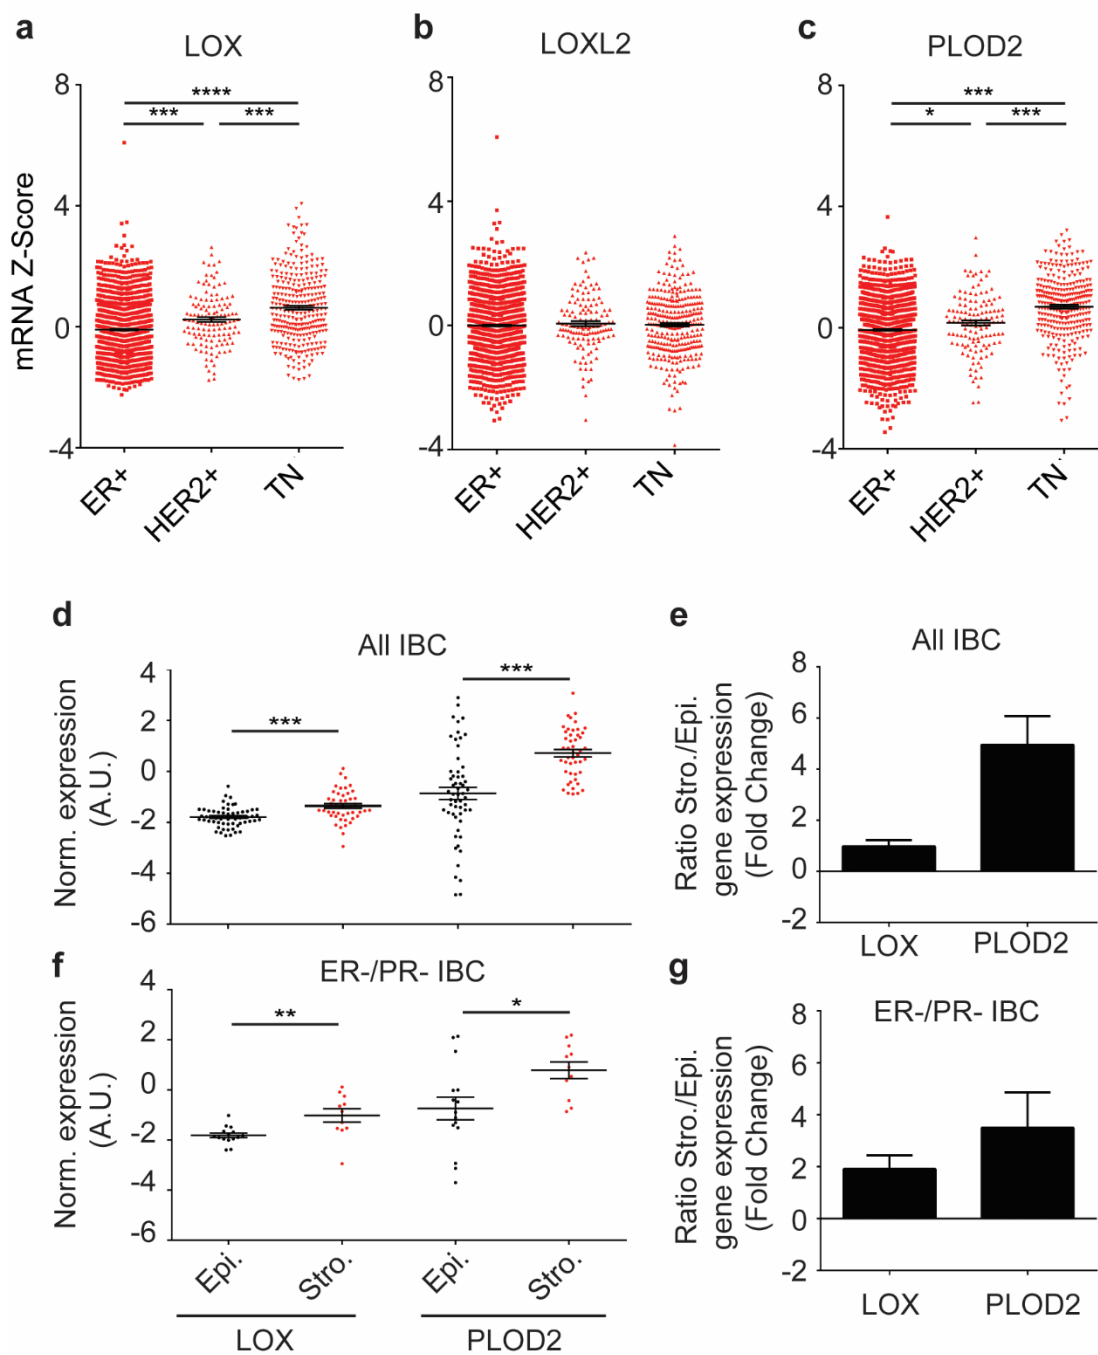

**Figure 2: LOX and PLOD2 are enriched in TNBC and predominantly expressed by stromal cells.** (a-c) Gene expression analysis of LOX (a), LOXL2 (b), and PLOD2 (c) stratified by ER<sup>+</sup> (n = 1355), HER2<sup>+</sup> (n = 127), and triple negative (TN; n = 299) subtypes. Gene expression is plotted as a scatter plot of mRNA z scores with the mean  $\pm$  SEM. Statistical analysis was performed using one-way ANOVA for overall analysis and unpaired t-test was used for individual comparisons (\**p* < 0.05, \*\**p* < 0.01, \*\*\**p* < 0.001, \*\*\*\**p* < 0.0001). (d) Scatter plot of individual and mean values  $\pm$  SEM comparing LOX (n = 47) and PLOD2 (n = 57) gene expression in microdissected epithelial and stromal compartments of human invasive breast carcinomas. Statistical analysis was performed using Mann-Whitney U test (\*\*\*\**p* < 0.0001). (e) Quantification of LOX and PLOD2 gene expression fold change from (d) in stromal cells relative to epithelial cells. (f-g) Restriction of the stromal/epithelial gene expression analysis in (d) and (e) to estrogen receptor (ER) negative and progesterone receptor (PR) negative samples. (LOX n = 11, PLOD2 n = 15). Statistical analysis was performed using Mann-Whitney U test (\**p* < 0.05, \*\**p* < 0.01).



Fig 3

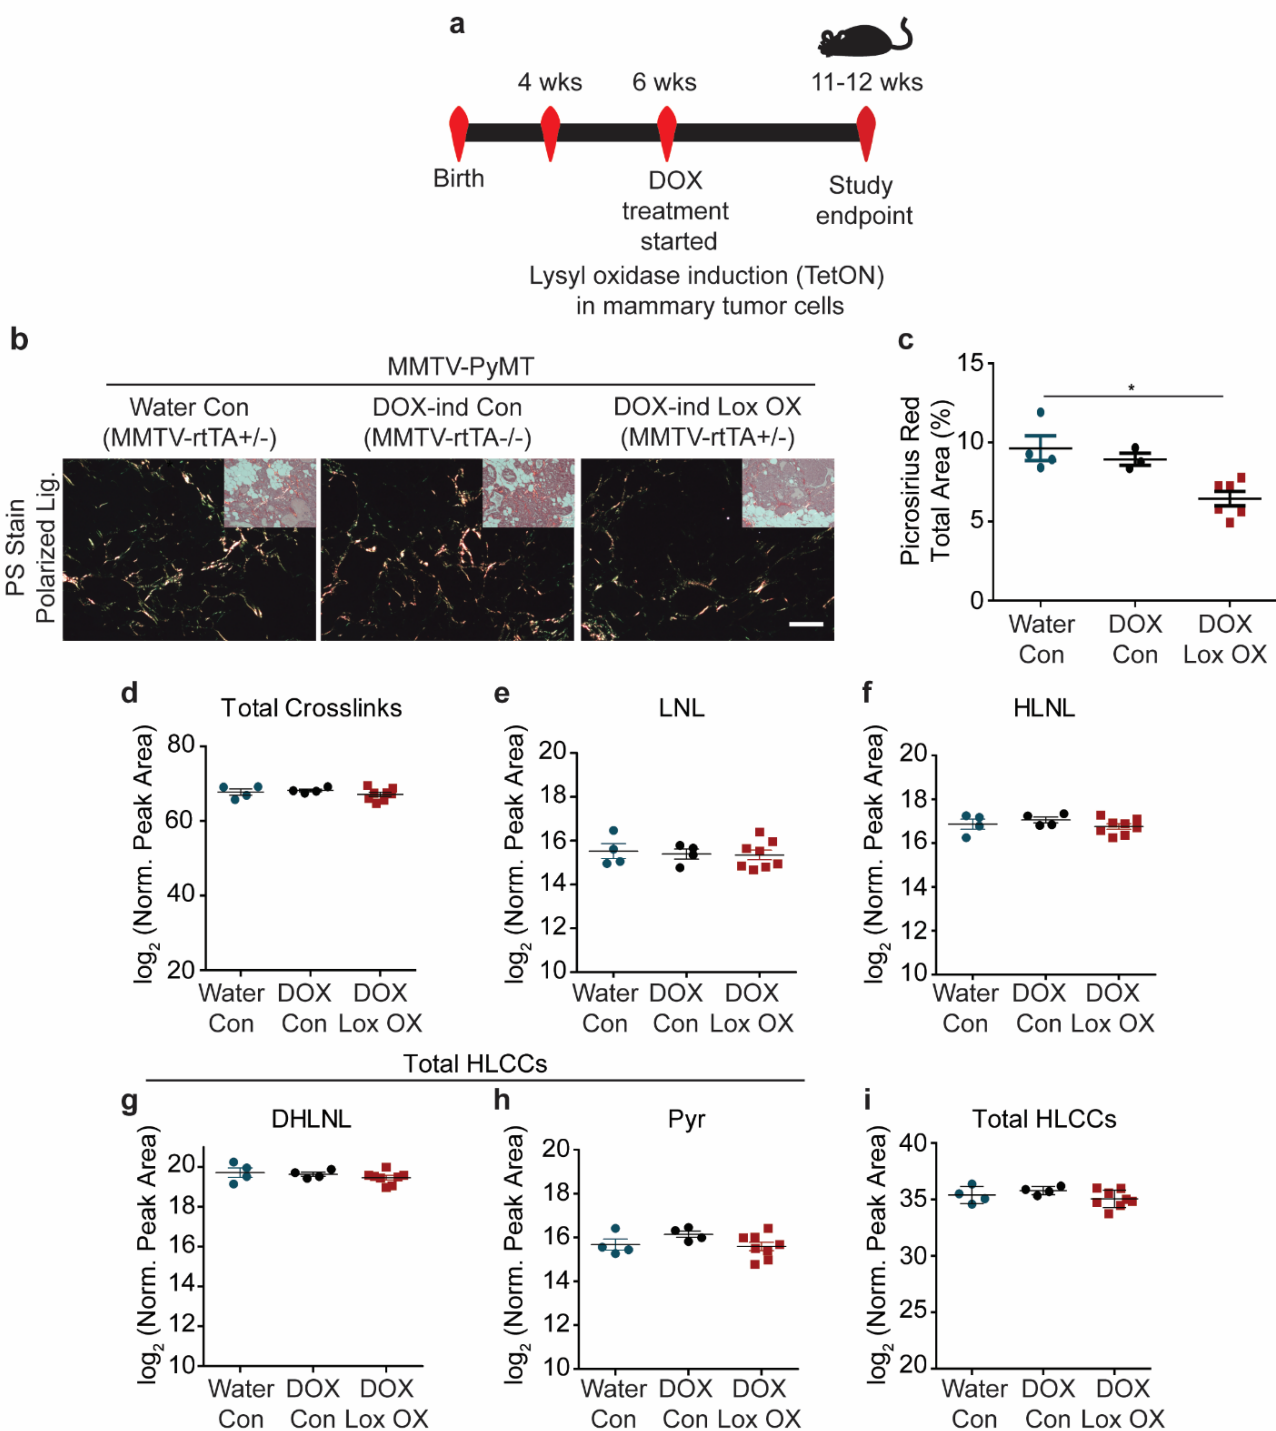

**Figure 3: Epithelial-derived collagen crosslinking enzymes fail to induce collagen crosslinking.** (a) Schematic depicting the experimental strategy used to induce epithelial Lox overexpression. (b) Polarized light images with brightfield inset of picosirius red stained murine mammary tissues. (c) Quantification of percent area of picosirius red staining per field of view, plotted as a scatter plot of the mean for each animal  $\pm$  SEM. Statistical analysis was performed using Kruskal-Wallis one-way ANOVA (\* $p < 0.05$ ). (d) Scatter plot showing individual and mean values  $\pm$  SEM of total tissue collagen crosslinks in PyMT controls (Water  $n = 4$ , DOX  $n = 4$ ) and PyMT epithelial Lox overexpression ( $n = 8$ ). (e-h) Scatter plots showing individual and mean values  $\pm$  SEM for each LCC and HLCC collagen crosslink measured in PyMT control and PyMT epithelial Lox overexpression tumor tissue. (i) Scatter plot showing individual and mean values  $\pm$  SEM of total HLCCs calculated as the sum of DHLNL and Pyr crosslinks. Quantity of crosslinks per tissue was calculated normalizing crosslinks to total collagen content (i.e., hydroxyproline abundance) and wet tissue weight. Values were plotted as  $\log_2$  transformed normalized peak areas as quantified from LC-MS data. Statistical analyses for crosslinking data were performed using one-way ANOVA for overall comparison and unpaired t-test for individual comparisons (\* $p < 0.05$ , \*\* $p < 0.01$ , \*\*\* $p < 0.001$ , \*\*\*\* $p < 0.0001$ ).

**Fig 4**

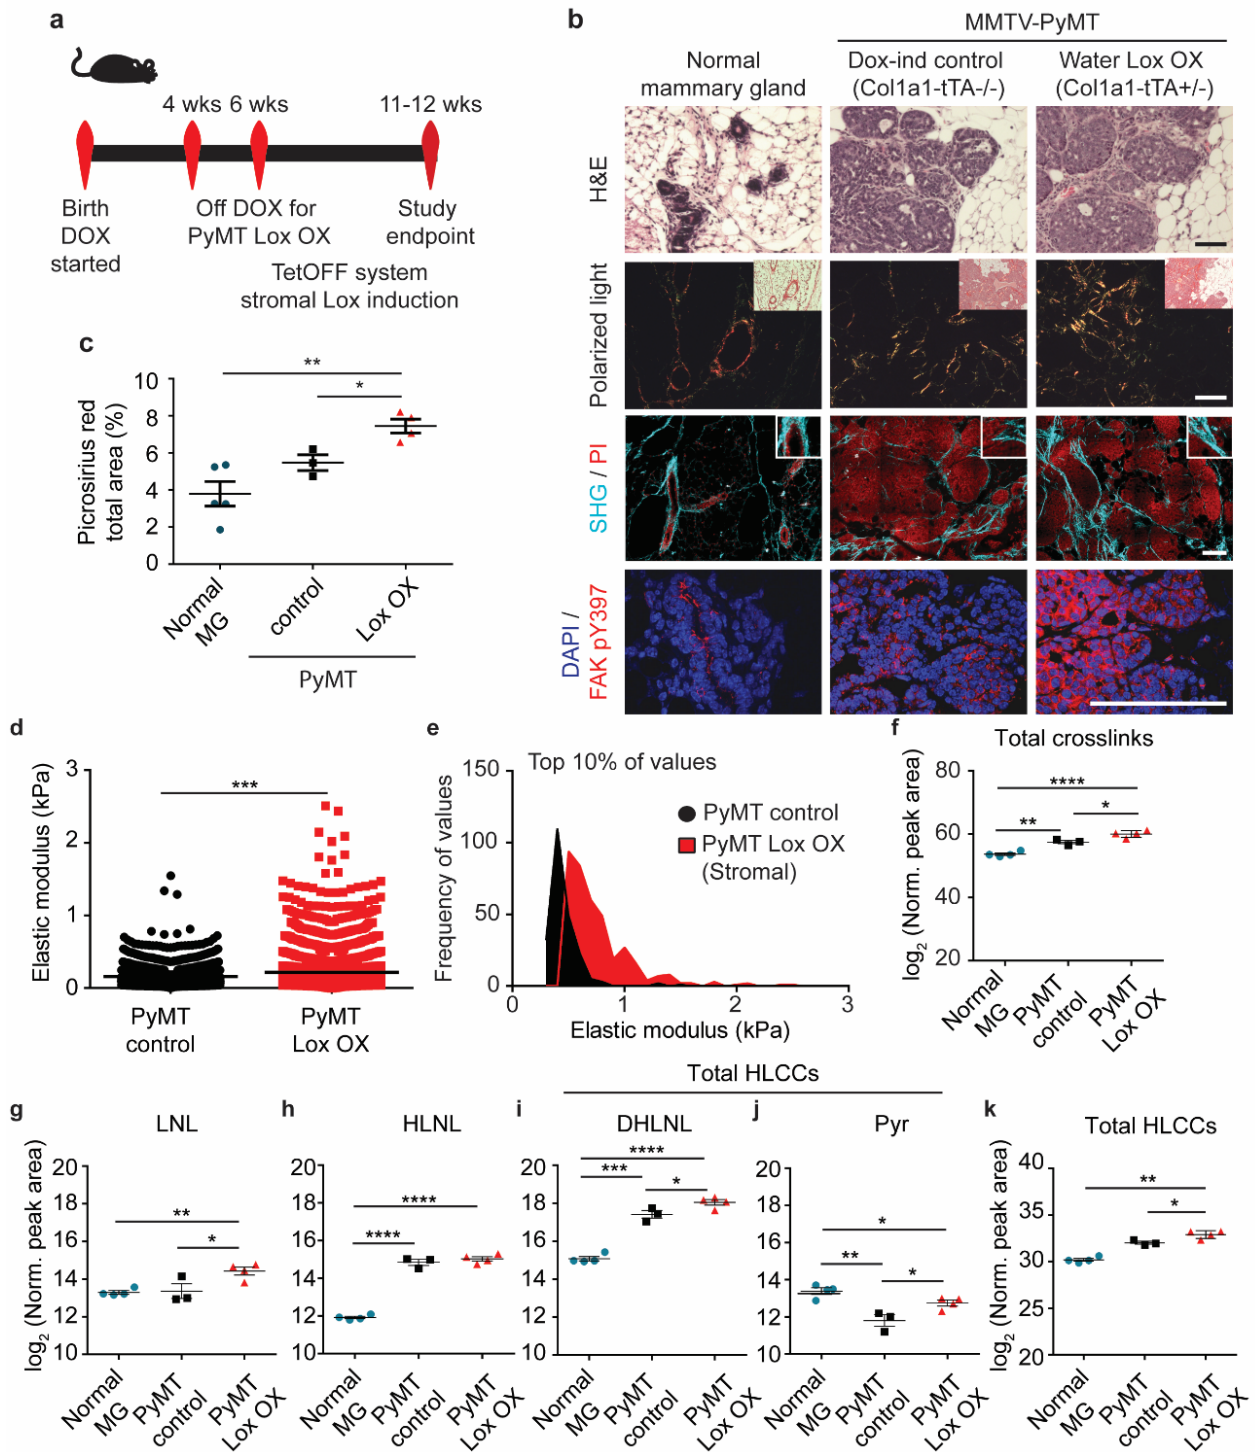

**Figure 4: Stromal-derived LOX regulates collagen crosslinking and stiffening.** (a) Schematic depicting the experimental strategy used to induce stromal Lox overexpression. (b) Representative images of normal murine mammary gland and PyMT control and stromal Lox overexpressing tumor tissues. (Top row) Brightfield images of H&E stained murine mammary tissues. (Second row) Polarized light images with brightfield inset of picosirius red stained murine mammary tissues. (Third row) Two photon second harmonic generation (SHG) images of murine mammary tissues revealing collagen organization (turquoise) and propidium iodide (PI; red) stained nuclei. (Bottom row) Confocal images of mammary tissue stained with anti-FAK pY397 monoclonal antibody (red) and DAPI (blue; nuclei). Scale bars are all 100  $\mu\text{m}$ . (c) Quantification of fibrillar collagen by picosirius red staining by percent area per field of view. The mean of 3-5 regions was calculated and plotted for each animal  $\pm$  SEM. Statistical analysis was performed using Kruskal-Wallis one-way ANOVA ( $*p < 0.05$ ) for overall relationship and unpaired t-test for comparing individual groups ( $*p < 0.05$ ,  $**p < 0.005$ ). (d) Scatter plot showing individual values and mean of the top 10% of elastic modulus measurements performed by AFM microindentation on the mammary stroma from mice with PyMT-induced tumors (PyMT Control;  $n = 3$  mice) as compared to the stroma in PyMT-induced tumors in which lysyl oxidase was elevated in stromal cells (PyMT Lox OX;  $n = 4$  mice). Values reflect measurements taken from 3-5 individual force map regions per mammary gland. Statistical analyses were performed using Mann-Whitney U test ( $***p < 0.001$ ). (e) Histogram showing the distribution of the top 10% of elastic modulus measurements by AFM microindentation in PyMT control and Lox OX tumors. Statistical analysis was performed using Mann-Whitney U test ( $****p < 0.0001$ ). (f) Scatter plots showing individual and mean values  $\pm$  SEM of total collagen crosslink abundance in the normal murine mammary gland ( $n = 4$ ) as compared to glands with doxycycline-induced PyMT tumors ( $n = 3$  mice per control group) and PyMT tumors in which stromal lysyl oxidase was elevated ( $n = 4$  mice per Lox OX group). (g-j) Scatter plots showing individual and mean values  $\pm$  SEM of LCC and HLCC crosslinks quantified in normal mammary gland, PyMT Control tumors and PyMT Lox OX tumors. (k) Scatter plot showing individual and mean values  $\pm$  SEM of total HLCCs calculated as the sum of DHLNL and Pyr crosslinks. Quantity of crosslinks per tissue was calculated normalizing crosslinks to total collagen content (i.e., hydroxyproline abundance) and wet tissue weight. Values were plotted as  $\log_2$  transformed normalized peak areas as quantified from LC-MS data. Statistical analyses for crosslinking data were performed using one-way ANOVA for overall comparison and unpaired t-test for individual comparisons ( $*p < 0.05$ ,  $**p < 0.01$ ,  $***p < 0.001$ ,  $****p < 0.0001$ ).

**Fig 5**

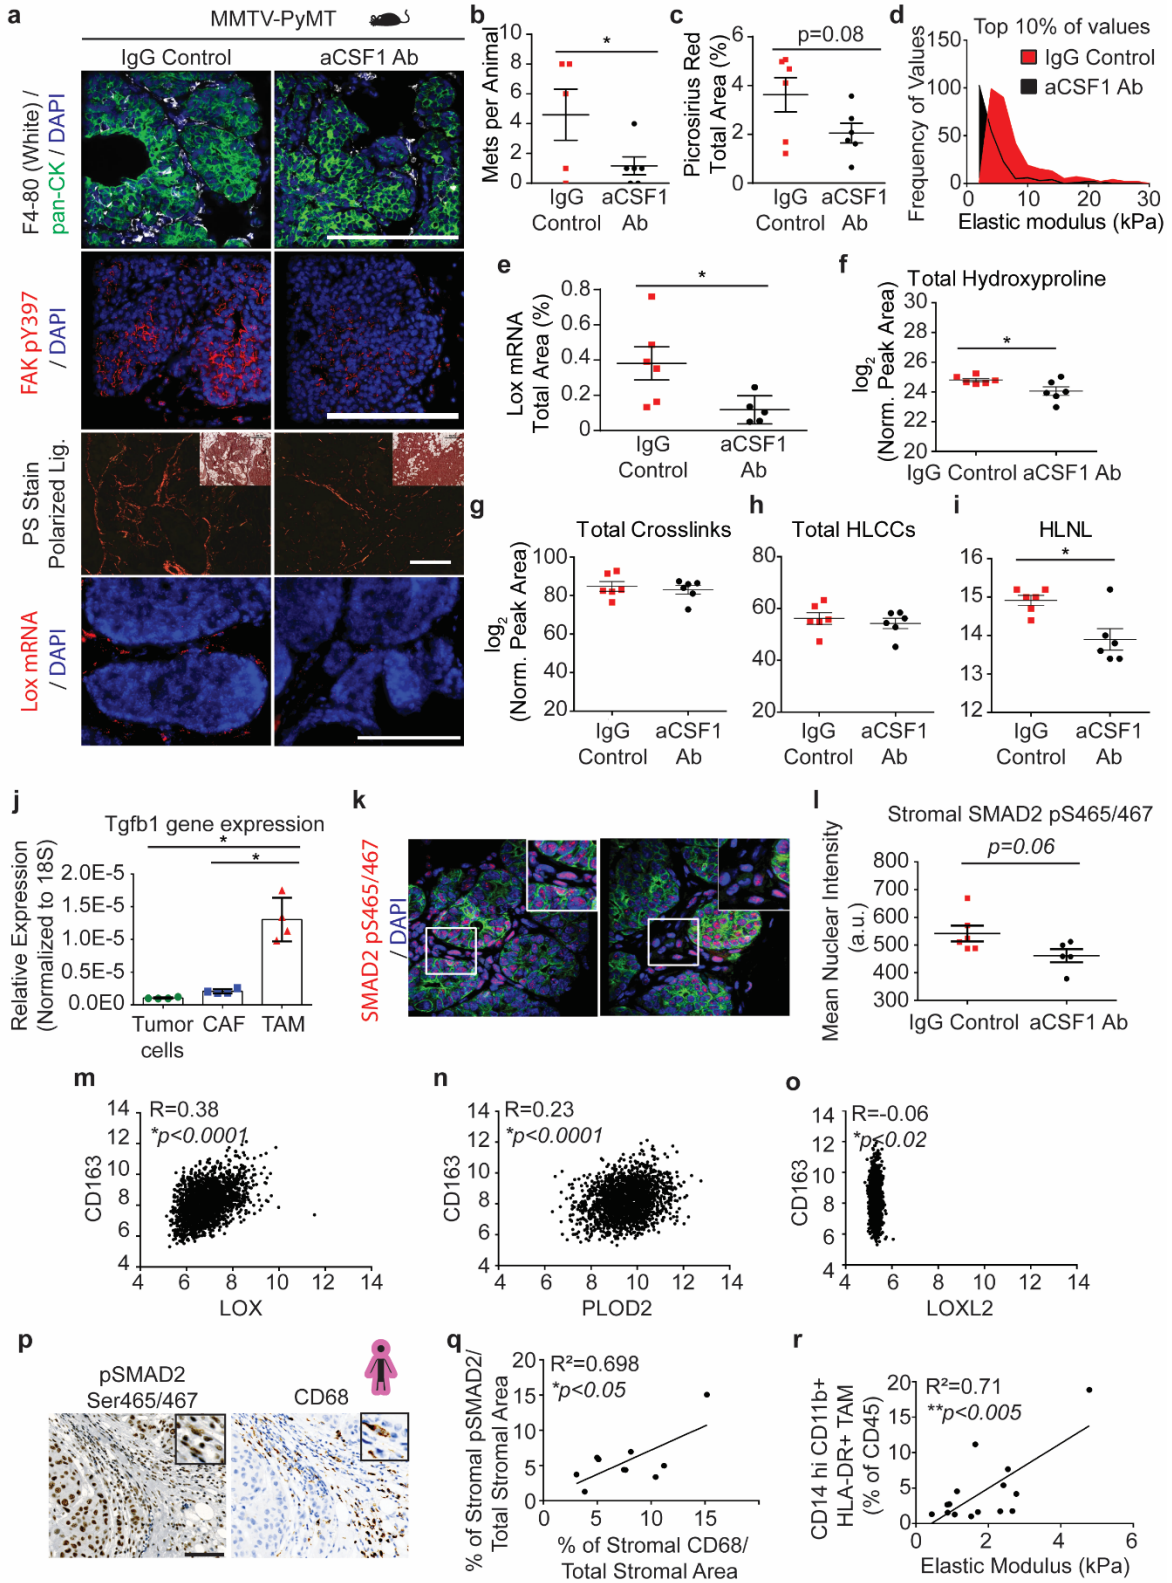

**Figure 5: Tumor infiltrating macrophages secrete TGF $\beta$  to activate stromal-mediated collagen crosslinking.** (a) Representative images of PyMT tumor tissue from 8 weeks of age mice treated with anti-CSF1 blocking antibody or IgG1 control. (**Top row**) IgG1 treated (n = 6) and anti-CSF1 treated (n = 5) PyMT tumor tissue stained for pan-cytokeratin (green) marking epithelial cells, F4/80 (white) marking tumor infiltrating macrophages, and DAPI marking nuclei (blue). (**Second row**) IgG1 treated (n = 6) and anti-CSF1 treated (n = 5) PyMT tumor tissue stained for tyrosine 397 phosphorylated focal adhesion kinase (red) indicative of mechanosignaling and DAPI marking nuclei (blue). (**Third row**) Polarized light images with brightfield inset of IgG1 treated (n = 6) and anti-CSF1 treated (n = 6) PyMT tumor tissue stained with picosirius red to visualize fibrillar collagen. (**Bottom row**) Lox mRNA in situ hybridization in IgG1 treated (n = 6) and anti-CSF1 treated (n = 5) PyMT tumor tissue and DAPI marking nuclei (blue). Scale bar for all images is 100 $\mu$ m. (b) Quantification of the number of metastatic colonies in the lung tissues from IgG1 treated (n = 5) and anti-CSF1 treated (n = 6) mice at 11 weeks of age via PyMT IHC assessing 5 layers (5 micron section; 5 sections per layer; 50-100 microns steps). Statistical analysis was performed using unpaired t-test (\*p < 0.05). (c) Quantification of fibrillar collagen by picosirius red staining by percent area per field of view in 8 week old mice treated with anti-CSF1 blocking antibody or IgG1 control. The mean of 3-4 regions was calculated and plotted for each animal  $\pm$  SEM. Statistical analysis was performed using unpaired t-test (p = 0.08). (d) Histogram showing the distribution of the top 10% of elastic modulus measurements by AFM microindentation in PyMT IgG1 treated (n = 6) and anti-CSF1 treated (n = 4) tumors. Statistical analysis was performed using Mann-Whitney U test (\*\*\*\*p < 0.0001). (e) Quantification of Lox mRNA signal by percent area of signal per field of view in 8 week old mice treated with anti-CSF1 blocking antibody (n = 5) or IgG1 control (n = 6). The mean of 5-6 regions was calculated and plotted for each animal  $\pm$  SEM. Statistical analysis was performed using an unpaired t-test (\*p < 0.05). (f-i) Scatter plots showing individual and mean values  $\pm$  SEM of the levels of total hydroxyproline (collagen content) (f), total collagen crosslinks (g), HLCCs (h), and HLNL crosslinks (i) in 8 week old IgG1 treated and anti-CSF1 treated PyMT tumors. Quantity of crosslinks per tissue was calculated normalizing crosslinks to wet tissue weight. Values were plotted as log<sub>2</sub> transformed normalized peak areas as quantified from LC-MS data. Statistical analysis was performed using unpaired t-test (\*p < 0.05). (j) Quantification of Tgfb1 gene expression by RT-qPCR in tumor cells, cancer-associated fibroblasts, and macrophages sorted out from PyMT tumors (n = 4). Gene expression was normalized to 18S. Statistical analysis was performed using Kruskal-Wallis one-way ANOVA for overall comparison and Mann-Whitney U test for individual comparisons (\*p < 0.05, \*\*\*p < 0.001). (k) Representative images of PyMT tumor tissue from mice treated with IgG1 (n = 6) and anti-CSF1 (n = 5) stained for pan-cytokeratin (green) marking epithelial cells, SMAD2 pS465/467 (red), and DAPI marking nuclei (blue). (l) Scatter plot showing individual and mean values  $\pm$  SEM of the mean nuclear intensity of pSMAD<sup>S465/467</sup> in stromal cells of IgG1 treated (n = 6) and anti-CSF1 treated (n = 5) PyMT mice. The mean for each animal was calculated from 4-7 regions within the tumor. Statistical analysis was performed using unpaired t-test (p = 0.06). (m-o) Scatter plot depicting the Spearman correlation of CD163 gene expression with LOX (m), PLOD2 (n), and LOXL2 (o) in human breast tumors (n = 1904). (p) Representative IHC images of serial human breast tumor sections stained for CD68 (top) and pSMAD2<sup>S465/467</sup> (bottom) counterstained with hematoxylin to mark nuclei. (q) Scatter plot depicting the linear regression correlation of stromal pSMAD2 IHC staining with stromal CD68 IHC staining in human breast tumors (n = 10). (r) Scatter plot depicting the linear regression of CD14<sup>+</sup> CD11b<sup>+</sup> HLA-DR<sup>+</sup> tumor associated macrophage infiltrate with tumor elastic modulus as measured by AFM microindentation in human breast tumors (n = 15).

**Fig 6**

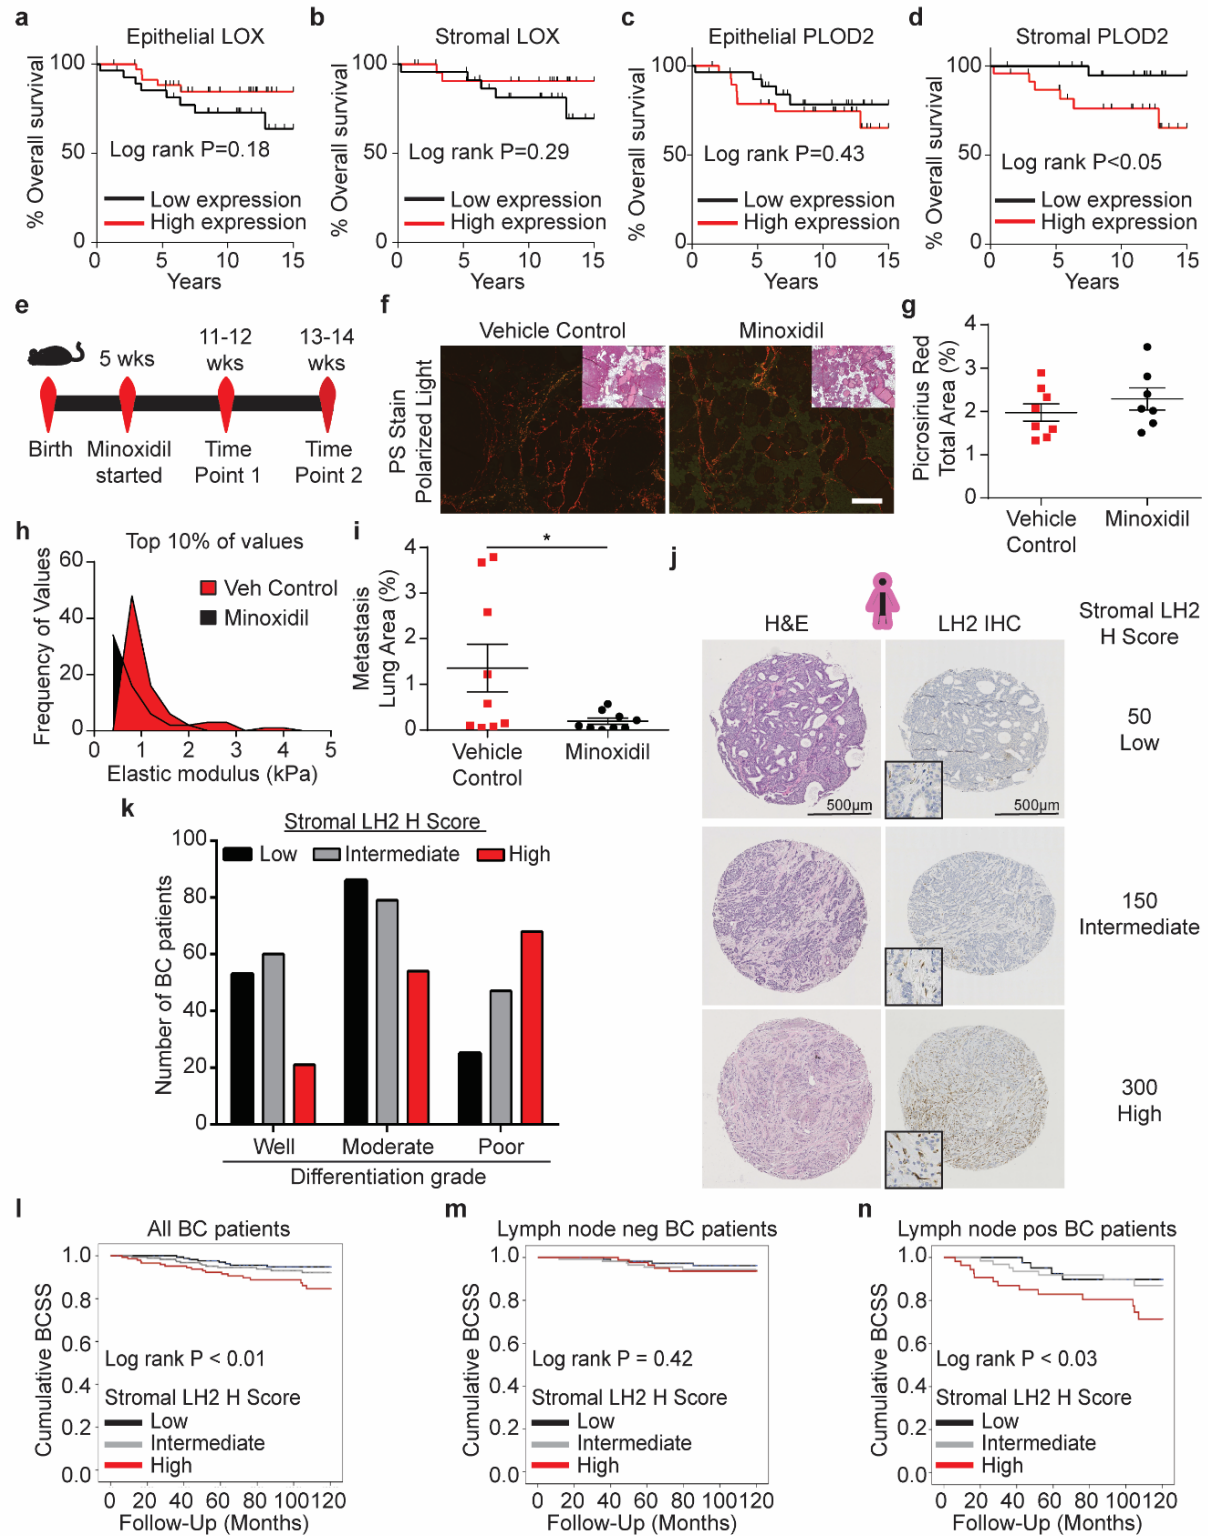

**Figure 6: Stromal LH2 predicts poor patient outcomes.** (a-b) Kaplan-Meier plots showing overall survival for patients based on levels of LOX expression in epithelial cells (low n = 28, high n = 36) (a) or stromal cells (low n = 23, high n = 24) (b). The median level of expression was defined as the cutoff for low and high expression. (c-d) Kaplan-Meier plots showing overall survival for patients based on levels PLOD2 expression in epithelial cells (low n = 28, high n = 29) (c) or stromal cells (low n = 23, high n = 24) (d). The median level of expression was defined as the cutoff for low and high expression. (e) Schematic depicting the experimental timeline used to inhibit lysyl hydroxylase 2 in PyMT mice. (f) Representative polarized light images with brightfield insets of picrosirius red stained tumor tissue from PBS vehicle treated control (n = 8) and minoxidil treated (n = 7) PyMT mice. Scale bar is 100um. (g) Quantification of fibrillar collagen by picrosirius red staining by percent area per field of view. The mean was calculated and plotted for each animal  $\pm$  SEM. (h) Histogram showing the distribution of the top 10% of elastic modulus measurements by AFM microindentation in PyMT control and Lox OX tumors. Statistical analysis was performed using Mann-Whitney U test (\*\*\*\*p < 0.0001). (i) Scatter plot quantifying the area of lung sections occupied by metastases from vehicle treated (n = 9) and minoxidil treated (n = 8) mice at 13 weeks of age via H&E staining and assessing 4 layers (5 micron section; 5 sections per layer; 50-100 microns steps). Statistical analysis was performed using a two-tailed unpaired t-test (\*p < 0.05). (j) Representative phase contrast images of sections from tissue microarrays (TMAs) of human breast cancers representing incident breast cancer cases collected and arrayed as 1-mm cores from each tumor. Sections were stained with Hematoxylin and Eosin (H&E; top) and lysyl hydroxylase two (LH2; bottom) via immunohistochemistry. (k) Bar graphs showing clinical correlation between lysyl hydroxylase two (LH2) score as a function of tumor grade (see *Table 1 for number of patients*). LH2 IHC staining was assessed with the semi-quantitative stromal specific H-score from 0 to 300. The lowest tertile of LH2 H-scores was defined as H-scores between 0 and less or equal to 120, the intermediate H-score to above 120 and equal or less than 230, and the highest stromal LH2 score as above 230. For tumor grade and LH2 H score, statistical analysis was performed using a linear-by-linear association (\*\*\*P<0.0001). (l) Kaplan-Meier curves indicating cumulative breast cancer specific survival (BCSS) based on stromal LH2 H score assessed in breast cancer patients up to 10 years after diagnosis (LH2 low n = 175, intermediate n = 188, high n = 146). (m) BCSS curves by stromal LH2 H score including only axillary lymph node negative patients (LH2 low n = 116, intermediate n = 116, high n = 90). (n) BCSS curves by stromal LH2 H score including only axillary lymph node positive patients (LH2 low n = 44, intermediate n = 63, high n = 54). For Kaplan-Meier curves, statistical analyses were performed by LogRank test.
